# Supplementary material for: Gender of children and social provisions as predictors of unplanned pregnancies in Pakistan: a cross-sectional survey
Source: BMC Res Notes. 2018 Aug 14;11:587. doi: 10.1186/s13104-018-3696-8 (PMC6092811; doi:10.1186/s13104-018-3696-8)
Supplement: Supplementary file 1 — Additional file 1. Social provisions, anxiety and depression during pregnancy. This dataset contains all variables pertaining to the publication including demographic characteristics, family composition, social support, anxiety and depression among pregnant women in Pakistan. [file 13104_2018_3696_MOESM1_ESM.csv]

Ethnicity	Education	background	Household_Income	Household_decision	Age_Maternalnew	LiveBirths	StillBirths	Fights_inlaws	Child_death	Miscarriage	Relationship_prob	Long_illness	other	Anxiety	Depression	AnxietyTri	DepressionTrie	AnxietyDi	DepressionDi	Social_Support	Statement1	Statement2	Statement3	Statement4	Statement5	Statement6	Statement7	Statement8	Statement9	Statement10	Statement11	Statement12	Statement13	Statement14	Stat1	Stat2	Stat3	Stat4	Stat5	Stat6	Stat7	Stat8	Stat9	Stat10	Stat11	Stat12	Stat13	Stat14	Stat15
1	4	2	1	3	20	1	0	0	0	0	0	0	0	5	2	0	0	0	0	96	0	1	1	0	0	0	0	1	1	0	2	0	1	0	4	4	4	4	4	4	4	4	4	4	4	4	4	4	4
1	1	3	2	2	29	6	0	0	0	0	0	0	0	3	5	0	0	0	0	58	0	1	0	0	0	0	0	1	0	0	3	0	0	3	1	3	1	3	3	3	3	3	3	2	2	2	3	2	3
2	5	1	1	4	20	6	1	0	0	0	0	0	0	12	13	2	2	1	1	62	1	1	2	1	1	3	2	2	2	2	3	3	1	1	2	3	3	2	3	3	3	3	3	4	3	2	2	3	2
1	1	2	1	2	23	6	0	0	0	0	0	0	0	8	4	1	0	1	0	68	1	1	1	1	2	0	2	1	0	0	2	0	0	1	3	2	2	3	3	3	3	3	2	3	3	3	3	3	3
1	4	2	2	4	25	5	0	0	0	1	0	0	0	4	1	0	0	0	0	53	0	0	0	0	1	0	0	1	0	0	3	0	0	0	1	2	2	4	1	2	4	1	2	2	2	2	4	2	3
4	2	2	2	3	22	4	1	0	0	1	1	0	0	9	7	1	0	1	0	65	1	1	3	0	2	0	0	3	0	3	2	0	1	0	3	2	3	2	3	2	2	3	2	3	3	3	3	3	2
1	1	3	2	4	30	5	0	0	0	1	0	0	0	8	4	1	0	1	0	94	1	1	3	0	2	0	0	0	1	3	0	0	1	0	4	4	4	4	4	4	4	4	4	4	4	4	4	4	4
1	1	3	2	3	23	5	0	0	0	0	0	0	0	13	10	2	1	1	1	59	1	2	2	0	1	2	2	1	3	1	2	2	2	2	2	2	4	2	3	2	4	2	3	2	2	2	3	1	2
1	3	2	2	4	20	4	1	0	0	0	0	0	0	13	14	2	2	1	1	61	2	2	3	1	1	3	1	3	3	1	2	2	1	2	3	3	4	2	2	2	3	2	3	3	3	3	2	2	3
1	1	1	2	2	28	4	0	0	0	0	0	0	0	7	6	0	0	0	0	82	1	1	2	0	0	0	0	2	1	0	3	0	0	3	3	4	4	3	3	4	3	3	4	4	3	3	3	4	4
1	1	3	1	4	20	4	0	0	0	0	0	0	0	6	10	0	1	0	1	60	0	0	1	3	1	1	1	0	1	3	1	0	1	3	3	3	3	1	4	1	1	4	1	3	3	3	1	3	1
1	2	2	2	1	26	4		1	0	0	0	0	0	5	8	0	1	0	1	84	0	1	0	1	0	1	2	0	2	0	1	2	0	3	4	4	4	3	4	4	3	3	4	4	4	3	2	4	4
1	2	2	2	1	25	4	1	0	0	0	0	0	0	5	6	0	0	0	0	86	0	2	0	1	0	1	1	1	1	0	1	1	2	0	4	3	3	3	3	3	4	3	4	4	3	4	3	4	4
2	2	1	1	2	21	4	0	0	0	1	0	0	0	11	12	2	2	1	1	63	1	2	2	2	2	2	1	2	2	1	2	1	1	2	3	2	3	3	2	3	2	2	3	3	3	2	2	2	3
1	4	3	2	4	22	4	0	0	0	0	0	0	0	10	3	1	0	1	0	71	0	2	2	0	2	0	1	0	2	1	2	0	1	0	3	4	3	4	2	3	3	2	3	3	3	3	3	3	3
2	1	3	1	4	24	4	0	0	0	1	0	0	0	13	14	2	2	1	1	63	2	2	1	1	2	3	1	2	2	2	3	2	2	2	2	2	4	3	3	3	3	3	2	2	3	2	1	3	4
2	1	1	2	3	21	4	2	0	0	0	0	1	0	13	11	2	2	1	1	62	1	2	3	0	1	3	2	1	2	1	2	2	2	2	3	2	4	2	2	2	4	2	3	3	3	2	1	4	3
1	5	1	1	2	23	4	2	1	0	1	0	0	0	12	9	2	1	1	1	56	1	2	3	1	2	3	2	1	2	1	1	1	1	0	3	3	4	2	2	2	2	2	2	2	3	2	2	1	3
1	5	1	2	2	23	4	1	0	0	0	0	0	0	13	11	2	2	1	1	57	2	1	2	1	3	3	2	1	2	1	1	2	1	2	3	2	4	2	2	3	2	2	2	2	3	1	3	2	3
1	3	3	1	3	20	3	0	0	0	1	0	0	1	1	5	0	0	0	0	71	0	0	0	0	0	0	0	0	1	1	0	3	0	1	4	3	3	1	3	3	2	4	3	3	3	3	4	3	2
1	4	2	1	3	22	2	1	0	1	1	0	0	0	14	9	2	1	1	1	66	3	1	3	1	2	0	0	2	2	2	2	1	2	2	3	3	3	2	2	3	3	2	3	1	3	3	3	3	2
2	1	1	2	2	23	3	1	0	0	0	0	0	0	15	12	2	2	1	1	59	2	1	3	2	1	3	2	2	3	1	2	1	2	2	2	2	3	2	2	3	3	4	2	2	3	2	2	4	3
3	4	3	2	3	21	3	1	0	0	0	0	0	0	9	5	1	0	1	0	87	2	1	3	1	1	1	0	1	1	0	1	1	1	0	4	4	4	3	4	4	4	4	4	4	4	4	1	3	4
1	2	3	3	2	28	3		0	0	0	0	0	0	5	2	0	0	0	0	88	1	1	0	0	0	0	1	1	1	0	1	0	1	0	4	4	3	3	3	3	4	4	3	4	3	4	4	4	4
1	2	1	1	2	29	3	0	0	0	0	0	0	0	2	11	0	2	0	1	75	0	0	0	0	1	0	0	2	1	3	1	3	0	3	4	3	4	1	3	3	2	4	3	3	4	4	3	3	2
2	1	1	2	2	22	3	0	0	0	0	1	0	0	9	10	1	1	1	1	64	1	1	1	2	1	3	0	2	3	1	2	0	1	1	3	2	4	2	2	3	2	3	3	2	4	3	3	3	4
1	2	3	2	4	19	3	0	0	0	0	0	0	0	2	3	0	0	0	0	52	1	0	0	0	0	0	0	1	0	2	1	0	0	0	1	2	2	3	1	2	4	1	2	2	2	2	4	2	3
1	4	1	2	2	22	3	0	0	0	0	0	0	0	11	11	2	2	1	1	59	1	2	2	2	1	3	1	1	2	2	2	0	2	1	3	3	3	3	1	2	3	4	2	2	3	2	2	2	3
1	3	3	1	3	22	3	0	0	0	0	0	1	0	6	11	0	2	0	1	67	0	1	1	2	1	0	0	2	1	1	2	2	1	3	3	2	3	2	2	3	2	2	3	3	3	3	3	3	3
1	4	2	2	2	24.9	1	2	1	1	1	0	1	0	17	9	2	1	1	1	77	3	2	3	0	3	3	3	1	1	2	2	1	2	0	1	4	4	4	4	1	3	3	1	4	4	4	4	3	3
1	4	2	2	2	25	3	1	0	0	1	0	0	0	6	3	0	0	0	0	89	1	1	0	0	1	0	3	1	0	1	0	0	1	0	4	4	4	4	3	4	4	4	4	4	3	1	4	4	4
1	1	3	2	1	31	3	0	1	0	1	0	1	1	11	6	2	0	1	0	96	1	3	3	0	1	0	1	1	2	1	2	0	1	1	4	4	4	4	4	4	4	4	4	4	4	4	4	4	4
1	1	2	1	2	15	3	0	1	1	0	1	1	0	11	8	2	1	1	1	60	1	1	2	0	2	1	2	2	1	1	1	1	2	2	2	2	2	2	2	3	3	2	2	3	2	3	3	3	3
1	4	2	2	1	18	3	0	1	0	1	1	0	0	8	1	1	0	1	0	74	1	0	2	0	3	1	0	0	0	0	2	0	0	0	3	2	4	3	1	4	3	1	4	4	3	3	3	4	4
1	2	3	2	4	19	3	0	0	0	0	0	0	0	2	3	0	0	0	0	52	1	0	0	0	0	0	0	1	0	2	1	0	0	0	1	2	2	3	1	2	4	1	2	2	2	2	4	2	3
1	4	2	2	2	21	3	1	0	0	1	0	1	0	8	8	1	1	1	1	86	1	1	1	1	1	2	2	1	1	1	1	1	1	1	4	3	4	3	4	4	4	4	4	3	3	4	3	4	4
1	1	1	3	2	23	3	1	1	0	0	0	0	0	15	15	2	2	1	1	59	2	2	2	1	2	3	1	3	3	3	3	1	2	2	3	3	4	2	2	2	2	2	2	3	3	2	2	2	2
2	1	1	2	2	23	3	0	0	0	0	0	0	0	11	10	2	1	1	1	61	1	2	2	1	2	2	2	1	2	1	2	1	0	2	1	4	2	3	2	3	3	3	3	2	3	2	3	2	2
4	3	2	2	3	18	3	1	0	0	0	0	0	0	0	0	0	0	0	0	74	0	0	0	0	0	0	0	0	0	0	0	0	0	0	4	4	4	1	4	1	2	4	1	4	4	4	1	4	1
2	3	2	2	4	26	3	0	1	0	1	0	0	0	14	9	2	1	1	1	65	2	0	2	1	3	3	1	1	3	1	2	1	1	2	3	3	4	2	2	3	3	3	3	3	3	2	2	3	2
1	1	3	2	4	23	3	1	0	0	0	0	0	0	14	16	2	2	1	1	62	2	2	1	2	2	3	2	3	2	2	3	2	2	2	1	4	4	3	3	3	3	1	2	2	3	3	1	3	2
1	4	2	1	2	21	3	1	0	0	0	0	0	0	13	12	2	2	1	1	67	2	1	2	1	3	3	1	3	1	2	2	0	2	2	3	3	4	3	3	3	3	3	2	3	3	1	1	3	3
1	1	2	2	2	24	3	2	0	1	1	0	0	0	12	7	2	0	1	0	89	0	1	2	1	3	1	0	0	2	3	2	1	3	0	4	4	4	4	4	4	4	4	2	4	4	1	4	4	4
1	4	2	2	3	18	3	0	0	0	0	0	0	0	3	3	0	0	0	0	86	1	0	1	0	0	0	0	1	1	0	0	0	0	2	4	4	4	4	3	4	3	4	4	4	4	4	4	4	4
1	4	1	1	2	19	3	2	1	0	0	0	0	0	15	12	2	2	1	1	65	2	2	3	0	3	3	2	1	2	1	1	3	2	2	3	2	4	3	3	3	3	4	3	3	3	3	1	4	2
1	3	1	3	3	22	3	0	0	1	0	0	1	0	12	5	2	0	1	0	67	1	1	3	1	3	0	0	1	1	2	3	0	1	0	4	3	4	4	2	1	4	1	2	3	3	3	1	3	3
1	1	1	2	2	22	3	1	1	0	0	0	0	0	13	12	2	2	1	1	62	1	2	2	1	1	2	3	1	2	1	2	3	2	2	3	3	3	3	2	3	2	1	2	3	3	3	2	3	2
1	1	3	1	2	24	3	2	0	0	0	0	0	0	16	14	2	2	1	1	62	2	2	3	2	1	3	2	2	3	2	3	2	2	1	3	3	4	2	2	3	2	3	3	3	2	2	2	3	3
3	2	1	2	3	16	2	1	0	1	1	0	1	0	9	4	1	0	1	0	70	0	0	3	0	2	1	0	2	2	1	2	0	0	0	3	2	2	2	1	4	3	2	2	2	3	3	3	4	4
2	7	2	2	4	19	3	0	0	0	0	0	0	0	0	1	0	0	0	0	63	0	1	0	0	0	0	0	0	0	0	0	0	0	0	2	3	3	1	3	3	2	4	3	4	2	2	4	4	2
1	6	2	3	4	24	3	1	0	0	0	0	0	0	8	10	1	1	1	1	89	1	1	0	0	2	2	1	2	1	2	1	2	2	1	4	4	4	3	3	4	3	4	4	3	4	4	4	4	4
2	3	1	2	3	20	3		0	0	0	0	0	0	18	6	2	0	1	0	87	1	3	3	0	3	0	3	0	3	3	2	0	3	0	4	4	4	4	4	4	3	4	4	4	3	3	4	4	4
4	4	3	2	2	22	3	0	0	0	0	0	1	0	4	4	0	0	0	0	91	0	0	0	0	1	0	0	0	0	1	3	0	0	3	4	4	4	4	2	4	4	2	4	4	4	4	4	4	4
2	3	2	2	1	23	3		0	0	0	0	0	0	4	11	0	2	0	1	91	0	2	0	3	0	0	1	0	0	1	2	2	1	3	4	4	4	1	3	4	4	4	4	4	4	4	4	4	4
2	3	2	1	2	25	3	0	0	0	0	0	0	0	11	5	2	0	1	0	70	0	0	2	0	3	0	0	1	2	3	2	0	2	1	3	3	3	3	2	3	3	2	3	3	3	3	3	3	3
1	3	2	1	2	27	3	0	0	0	0	0	0	0	9	9	1	1	1	1	74	3	1	1	0	1	0	0	1	0	3	2	1	2	3	2	3	3	3	3	4	3	3	4	3	4	3	3	3	3
1	2	2	2	4	19	2	1	0	0	1	0	0	0	4	4	0	0	0	0	68	0	0	0	0	1	0	0	1	2	0	0	0	1	3	3	2	3	2	2	3	3	2	3	3	3	3	3	3	3
1	2	2	2	4	23	3	1	0	0	0	0	0	0	6	11	0	2	0	1	84	0	3	2	3	1	0	0	1	0	3	1	0	2	1	1	4	1	4	4	4	4	4	4	4	4	4	4	4	4
1	4	1	2	4	21	3	0	0	0	0	0	0	0	9	9	1	1	1	1	85	0	2	2	0	2	2	0	2	1	2	2	0	2	1	4	2	3	4	3	4	3	3	2	4	3	3	4	4	4
1	3	2	1	3	23	3	0	0	0	0	0	0	0	7	7	0	0	0	0	71	0	3	2	0	2	0	1	2	0	2	1	0	1	0	3	3	3	3	3	3	3	3	3	3	3	3	3	3	3
1	4	1	2	3	22	2	0	0	1	0	0	0	0	2	0	0	0	0	0	68	0	0	0	0	0	0	0	0	0	0	2	0	0	0	3	2	3	2	2	4	3	2	3	3	3	3	3	3	3
1	4	2	2	3	22	2	0	0	0	0	0	0	0	3	0	0	0	0	0	76	0	0	1	0	0	0	0	0	0	0	2	0	0	0	3	3	3	3	3	4	4	3	3	4	3	3	3	3	3
1	1	3	2	2	18	2	0	1	1	0	0	0	0	16	15	2	2	1	1	62	1	2	3	2	3	1	3	3	3	3	0	3	3	1	1	4	2	3	1	3	3	2	3	1	3	3	3	2	3
3	2	3	2	2	20	2		0	0	0	0	0	0	10	5	1	0	1	0	82	1	2	2	0	2	0	1	1	1	2	1	0	2	0	3	4	3	3	4	4	3	4	4	4	3	4	3	4	3
4	1	2	1	2	20	2	1	0	1	0	1	0	0	12	9	2	1	1	1	92	1	2	1	0	2	2	3	2	1	2	2	1	2	0	4	4	4	3	4	4	4	4	4	4	4	4	4	4	4
3	2	3	2	3	20	2		0	0	0	0	0	0	10	9	1	1	1	1	89	1	1	2	2	1	1	1	1	2	2	1	1	2	1	4	4	4	3	4	4	3	4	4	4	3	4	3	4	3
1	4	2	1	3	22	2	0	1	0	0	0	0	0	5	6	0	0	0	0	68	1	2	0	1	1	0	0	0	0	3	3	0	0	0	3	2	3	3	3	3	3	3	3	3	3	3	3	2	3
1	5	2	2	2	23	1	0	1	0	1	0	0	0	13	1	2	0	1	0	59	0	0	3	0	2	1	3	0	0	0	3	0	2	0	3	4	4	3	3	1	3	3	2	1	4	1	1	2	3
1	4	1	2	4	25	2	1	0	0	0	0	0	0	12	10	2	1	1	1	66	1	1	3	1	2	2	1	1	1	3	2	0	2	2	3	3	4	4	3	3	3	2	2	3	3	2	2	2	2
5	1	1	2	3	27	0	0	0	0	1	0	0	0	0	7	0	0	0	0	96	0	1	0	0	0	0	0	0	0	0	0	3	0	3	4	4	4	4	4	4	4	4	4	4	4	4	4	4	4
1	3	3	1	3	21	2	0	0	0	1	0	0	0	4	6	0	0	0	0	85	1	0	1	0	0	0	0	3	1	0	0	0	1	3	4	4	4	4	3	4	3	3	4	4	4	4	4	4	4
1	3	3	1	3	21	2	0	0	0	0	0	0	0	4	6	0	0	0	0	85	1	0	1	0	0	0	0	3	1	0	0	0	1	3	4	4	4	4	3	4	3	3	4	4	4	4	4	4	4
1	6	2	2	2	26	2	0	0	0	0	0	0	0	3	1	0	0	0	0	83	0	0	0	0	0	0	0	0	1	0	2	0	0	1	4	4	4	4	3	4	3	4	4	4	4	4	1	4	4
2	6	1	3	2	27	2		1	0	0	0	0	0	15	9	2	1	1	1	88	3	0	3	3	1	1	1	3	3	2	1	0	3	0	4	4	1	3	4	4	4	4	4	4	3	4	4	4	4
1	4	2	2	4	32	0	1	0	0	1	0	0	0	9	10	1	1	1	1	67	3	2	0	1	1	0	2	2	0	3	2	0	1	2	2	3	3	3	2	3	3	2	3	3	3	3	3	3	3
2	1	3	2	4	22	2	1	1	0	0	0	1	0	15	12	2	2	1	1	58	2	2	1	2	1	3	3	1	2	2	3	2	3	0	2	2	4	3	3	3	4	1	2	2	2	2	1	3	1
1	3	3	3	3	28.9	2	0	0	1	0	0	0	0	13	7	2	0	1	0	95	1	1	2	1	3	1	2	1	1	2	3	0	1	1	4	4	4	4	4	4	4	3	4	4	4	4	4	4	4
2	3	1	1	2	20	2	0	0	0	0	0	0	0	13	9	2	1	1	1	62	1	1	1	0	2	3	2	1	2	1	2	1	3	2	3	2	3	3	3	4	2	1	3	3	3	2	3	3	3
1	3	2	3	2	22	2		1	0	0	0	0	0	8	6	1	0	1	0	86	1	1	1	1	1	0	1	1	2	2	1	1	1	0	3	3	4	3	4	4	3	4	4	4	3	4	4	4	4
1	4	3	2	3	19	2	0	1	0	0	0	0	0	5	7	0	0	0	0	96	0	2	2	0	0	0	0	0	0	2	3	3	0	0	4	4	4	4	4	4	4	4	4	4	4	4	4	4	4
1	3	3	2	3	22.9	2	0	0	0	1	0	0	0	1	2	0	0	0	0	91	0	0	0	0	0	0	0	1	0	0	1	0	0	1	4	4	4	3	4	4	3	4	4	4	4	4	4	4	3
1	3	2	2	2	19	2		1	0	0	0	1	0	10	11	1	2	1	1	88	1	1	1	1	2	2	2	1	2	2	1	1	1	3	4	3	4	4	4	3	3	4	4	4	4	3	4	3	4
1	3	1	2	3	19	2	0	0	0	0	0	0	0	3	7	0	0	0	0	68	0	0	0	1	1	0	0	0	0	3	2	0	0	3	3	2	3	2	2	3	3	2	3	3	3	3	3	3	3
1	3	1	2	3	22	2	2	1	0	0	0	0	0	17	10	2	1	1	1	63	2	1	3	2	3	3	2	1	2	1	3	0	2	2	2	4	3	1	3	3	2	2	3	3	3	2	3	3	4
1	3	3	2	3	21	2	0	0	0	0	0	0	0	3	8	0	1	0	1	74	0	1	0	0	0	0	2	0	0	2	1	2	0	3	4	3	3	1	1	3	2	1	4	4	4	4	4	4	2
2	4	1	2	3	22	2		0	0	0	0	0	0	7	5	0	0	0	0	93	0	0	0	0	0	0	3	0	0	2	2	0	2	3	4	4	4	1	4	4	4	4	4	4	4	4	4	4	4
7	5	2	2	3	25	3	1	0	1	1	0	0	0	15	9	2	1	1	1	93	3	2	3	1	2	1	1	1	2	3	2	1	2	0	4	4	4	4	4	4	4	4	4	4	4	3	4	4	4
1	1	1	1	1	22	2	0	1	0	0	1	1	0	8	4	1	0	1	0	68	2	1	0	0	1	0	1	1	2	1	1	1	1	0	3	2	3	2	3	3	2	3	3	3	3	3	3	3	3
1	4	3	1	3	22	2	0	0	0	0	0	0	0	3	0	0	0	0	0	83	0	0	0	0	0	0	0	0	0	0	3	0	0	0	4	3	4	1	4	4	2	4	4	4	4	4	4	4	1
1	6	2	2	4	30.5	2	0	0	1	1	0	0	0	14	7	2	0	1	0	59	3	1	2	0	2	0	2	2	2	2	2	0	1	2	3	2	3	3	2	2	3	2	2	3	2	3	2	2	3
1	5	3	3	2	21	2		0	0	0	0	0	0	11	11	2	2	1	1	86	1	2	1	1	2	2	2	3	0	2	2	1	3	0	4	4	4	4	3	4	3	4	4	1	2	3	4	4	4
1	1	1	2	2	17	2		0	0	0	0	0	0	9	8	1	1	1	1	81	1	1	2	0	2	2	1	1	1	1	1	2	1	1	3	4	4	2	3	3	4	4	4	4	3	3	3	4	3
1	4	3	1	4	22	2	1	0	0	1	0	0	0	9	1	1	0	1	0	94	1	0	3	0	2	0	0	1	0	0	3	0	0	0	4	4	4	4	4	4	4	4	4	4	4	4	4	4	4
1	4	3	1	4	22	2	1	0	0	1	0	0	0	9	1	1	0	1	0	94	1	0	3	0	2	0	0	1	0	0	3	0	0	0	4	4	4	4	4	4	4	4	4	4	4	4	4	4	4
1	4	2	1	3	22.5	2	0	0	1	0	0	0	0	7	2	0	0	0	0	68	1	0	0	0	0	0	3	1	0	1	1	0	2	0	3	3	3	2	2	3	3	2	3	3	3	3	3	3	3
1	6	2	2	3	45	2	0	0	0	1	0	0	0	2	3	0	0	0	0	96	0	1	0	0	0	0	0	1	0	1	2	0	0	0	4	4	4	4	4	4	4	4	4	4	4	4	4	4	4
1	4	3	2	3	22	1	0	0	0	0	0	0	0	2	1	0	0	0	0	93	0	0	0	0	0	0	0	1	1	0	1	0	0	0	4	4	4	3	4	4	4	4	4	4	4	4	4	4	4
1	4	2	3	3	21	1	1	0	0	1	0	0	0	11	5	2	0	1	0	81	1	2	1	0	1	0	2	1	3	1	1	1	2	0	3	4	4	3	4	4	3	4	4	4	3	4	3	4	4
1	4	1	2	2	22.5	1	0	0	0	0	0	0	0	3	5	0	0	0	0	73	0	0	1	0	0	0	0	2	0	0	2	0	0	3	4	2	3	3	2	4	3	2	4	3	3	3	3	3	3
2	2	1	1	2	23	1	0	1	0	0	0	0	0	13	10	2	1	1	1	61	1	0	2	1	3	3	2	2	2	2	1	1	2	1	4	2	4	3	3	3	2	3	3	2	1	2	2	3	2
1	5	2	3	3	24	1		0	0	0	0	0	0	6	1	0	0	0	0	90	0	0	0	0	1	0	3	0	2	1	0	0	0	0	4	4	4	4	4	4	4	4	4	4	4	4	4	4	4
1	4	1	2	2	26	0	1	0	0	1	0	0	0	10	5	1	0	1	0	84	1	0	3	0	1	1	0	1	1	2	2	1	2	0	3	4	4	3	3	4	3	3	4	4	3	3	3	4	4
1	1	2	2	2	19	1	1	1	1	0	0	0	1	1	4	0	0	0	0	82	0	0	0	0	0	0	0	1	0	0	1	0	0	3	4	1	4	3	4	1	3	4	1	4	4	4	4	4	4
1	3	3	2	3	22	1	0	0	0	0	0	0	0	2	1	0	0	0	0	93	0	0	0	0	0	0	0	1	1	0	1	0	0	0	4	4	4	3	4	4	4	4	4	4	4	4	4	4	4
1	4	1	1	2	20	1	0	0	0	1	0	0	0	13	12	2	2	1	1	62	2	1	2	1	2	3	1	2	1	1	3	2	2	2	3	1	4	3	2	3	3	3	2	3	2	1	2	3	2
1	2	1	2	2	22	1	0	0	0	0	0	1	0	12	12	2	2	1	1	63	1	1	2	2	1	3	1	2	2	2	3	0	2	2	3	2	4	2	2	3	3	2	3	2	3	3	2	4	3
1	4	2	3	4	24	1		1	0	0	0	0	0	8	3	1	0	1	0	84	1	1	2	0	0	0	1	1	1	1	2	0	1	0	3	4	4	4	4	3	3	3	3	3	4	4	1	4	3
1	5	2	2	2	24	0	0	0	0	1	0	0	0	9	4	1	0	1	0	70	3	1	1	0	2	0	0	2	0	1	2	0	1	0	3	3	3	3	2	3	3	2	3	3	3	3	3	3	3
1	5	1	3	2	22	1	1	1	0	0	1	0	0	4	11	0	2	0	1	95	0	1	1	3	0	1	3	3	0	3	0	0	0	0	4	4	4	4	3	4	4	4	4	4	4	4	4	4	4
1	5	2	2	3	23	1		1	0	0	0	1	0	13	7	2	0	1	0	88	2	1	2	2	2	0	2	0	1	1	2	2	2	1	4	3	4	4	4	4	2	4	4	4	3	4	3	3	4
1	5	2	2	1	23	1		1	0	0	0	0	0	10	10	1	1	1	1	87	1	2	1	1	1	1	2	2	2	2	1	1	2	1	4	4	3	3	4	4	3	3	4	3	4	4	4	4	4
1	5	2	2	2	24	1		1	0	0	1	0	0	12	9	2	1	1	1	91	2	1	2	1	2	3	2	1	1	1	1	1	2	1	4	4	4	4	4	3	3	4	4	4	4	4	4	4	4
1	1	2	1	2	19.5	1	0	1	0	0	0	0	0	6	4	0	0	0	0	68	0	0	1	0	1	0	0	3	1	1	2	0	1	0	3	3	3	3	2	2	3	2	4	3	3	3	2	3	3
2	3	2	2	3	20	1	0	0	0	0	0	0	0	16	9	2	1	1	1	67	1	0	3	1	2	3	3	1	2	2	2	0	3	2	3	3	3	3	2	3	3	2	3	3	3	2	3	3	3
2	3	2	2	2	22	1	0	1	0	0	0	0	0	8	16	1	2	1	1	67	1	2	2	2	2	3	1	2	1	3	0	2	1	2	3	3	4	3	3	3	2	2	2	2	3	3	1	4	4
1	4	2	2	3	27.5	1	0	1	0	0	0	0	0	7	11	0	2	0	1	67	1	1	2	1	1	0	1	1	1	2	1	3	0	3	3	3	3	3	3	2	3	3	2	1	3	3	3	2	3
2	4	2	1	3	25	0	1	1	0	0	0	0	0	7	8	0	1	0	1	70	1	0	1	1	1	0	0	2	1	3	2	0	1	2	4	2	3	3	3	2	3	3	2	4	3	3	3	3	3
1	3	2	1	3	15	1	0	1	0	1	0	0	0	17	12	2	2	1	1	40	0	3	3	3	3	3	2	0	3	0	3	0	3	3	1	1	1	1	1	4	1	1	4	1	2	2	4	2	1
1	1	1	2	3	20	1	0	1	0	1	0	0	0	3	3	0	0	0	0	96	0	0	0	0	0	0	0	0	1	1	2	0	0	2	4	4	4	4	4	4	4	4	4	4	4	4	4	4	4
1	1	1	2	3	20	1	0	1	0	1	0	0	0	3	3	0	0	0	0	96	0	0	0	0	0	0	0	0	1	1	2	0	0	2	4	4	4	4	4	4	4	4	4	4	4	4	4	4	4
2	4	2	3	2	21	1		0	0	0	0	0	0	9	8	1	1	1	1	84	2	0	1	2	1	1	1	1	2	3	1	0	1	1	4	4	4	3	3	4	3	4	4	4	3	2	4	4	3
1	4	2	3	2	22	1		1	0	0	0	0	0	12	6	2	0	1	0	87	1	0	2	1	1	1	1	1	3	2	2	1	2	0	4	4	4	3	4	4	3	4	4	4	3	4	4	4	4
1	3	1	2	2	22	1	0	0	0	0	0	0	0	10	12	1	2	1	1	61	1	1	3	2	1	2	1	2	2	2	2	1	0	2	3	2	3	3	2	2	3	2	2	3	4	4	2	4	3
1	4	2	1	2	23	1	1	1	0	1	0	0	0	12	10	2	1	1	1	60	1	0	2	0	1	3	1	1	3	2	2	2	2	2	2	2	3	3	3	2	3	3	2	3	1	2	2	3	2
1	5	1	3	2	27	1		0	0	0	0	0	0	4	10	0	1	0	1	88	1	1	0	1	1	0	0	3	0	3	1	2	1	0	4	4	4	4	3	4	4	3	4	4	3	4	4	4	4
1	1	2	2	2	28	1		0	0	0	0	0	0	10	12	1	2	1	1	88	1	1	2	1	2	1	0	2	2	2	2	2	1	3	4	4	4	3	3	4	3	4	4	4	3	3	4	4	4
3	1	2	2	2	15	1	5	0	1	1	0	0	0	19	11	2	2	1	1	63	3	0	3	1	3	2	1	3	3	3	3	1	3	1	3	3	4	4	1	1	4	1	1	4	1	4	2	4	4
1	4	2	1	3	22	1	0	0	0	0	0	0	0	14	14	2	2	1	1	65	2	2	3	1	2	3	1	3	2	3	3	0	1	2	3	2	3	3	2	3	3	4	4	3	2	2	2	4	4
1	6	2	2	4	26	1	0	0	0	1	0	0	0	11	7	2	0	1	0	80	0	1	2	0	3	0	2	3	1	2	3	0	0	1	4	3	4	4	1	4	3	1	4	4	3	4	4	2	4
1	1	3	1	3	29.9	1	0	0	1	0	0	1	0	13	5	2	0	1	0	73	1	1	2	0	2	1	2	0	2	1	3	1	1	1	4	3	3	4	1	3	4	3	4	3	3	4	1	3	3
1	5	3	2	3	32	1	0	0	0	0	0	0	1	11	6	2	0	1	0	62	2	2	2	0	2	1	2	1	1	1	1	0	1	1	2	3	2	3	1	3	3	1	3	2	3	3	4	2	3
1	6	3	3	2	24	1		1	0	0	0	0	0	11	7	2	0	1	0	87	3	1	2	1	3	1	0	2	1	1	0	1	2	0	4	4	4	3	3	3	3	4	4	4	3	4	2	4	4
1	5	2	2	3	16	1	0	1	0	0	0	0	1	6	7	0	0	0	0	91	1	3	0	0	1	0	0	1	1	3	2	0	1	0	4	4	4	4	4	3	4	4	2	4	4	4	3	4	4
1	5	2	2	3	17	1	0	1	0	0	0	1	0	6	7	0	0	0	0	91	1	3	0	0	1	0	0	1	1	3	2	0	1	0	4	4	4	4	4	3	4	4	2	4	4	4	3	4	4
1	3	3	2	3	18	1	0	0	0	0	0	0	0	0	1	0	0	0	0	96	0	0	0	0	0	0	0	0	0	0	0	0	0	1	4	4	4	4	4	4	4	4	4	4	4	4	4	4	4
1	3	3	2	3	18	1	0	0	0	0	0	0	0	0	1	0	0	0	0	96	0	0	0	0	0	0	0	0	0	0	0	0	0	1	4	4	4	4	4	4	4	4	4	4	4	4	4	4	4
1	5	2	1	3	23.5	1	0	0	0	1	0	0	0	6	2	0	0	0	0	73	1	0	2	1	0	0	0	0	0	1	2	0	1	0	3	2	3	3	3	4	3	3	3	4	3	3	3	3	3
1	3	2	1	3	25	0	0	1	0	1	1	0	0	8	10	1	1	1	1	60	1	3	1	3	2	1	1	0	0	3	0	0	3	0	2	2	2	3	3	2	3	3	2	3	3	2	2	2	3
1	3	1	2	3	25	0	1	0	0	0	0	0	0	7	9	0	1	0	1	74	1	2	2	0	1	0	1	1	0	3	1	0	1	3	3	2	3	3	3	4	3	3	3	4	3	3	3	3	3
1	5	3	2	3	26	1	0	1	0	0	0	0	0	5	4	0	0	0	0	94	0	1	0	0	0	0	0	3	2	0	3	0	0	0	4	4	4	4	4	4	4	4	4	4	4	4	4	4	4
1	3	3	1	3	27	1	0	1	0	1	0	1	0	10	8	1	1	1	1	43.8260869565217	2	0	2	0	2	1	0	2	1	2	1	0	2	3	1	2	2	1		2	2	1	2	2	2	2	1	2	2
1	5	3	2	2	30.5	1	0	0	0	1	0	0	0	4	5	0	0	0	0	68	1	1	1	1	1	0	0	1	0	1	1	1	0	0	3	2	3	3	3	2	3	3	2	3	3	2	3	3	3
2	5	2	2	4	34	1	0	0	0	1	0	1	0	10	5	1	0	1	0	71	2	1	1	0	1	0	2	2	1	1	2	0	1	1	3	3	3	3	3	3	3	3	2	3	3	3	3	3	3
1	4	2	2	3	23	1	0	0	0	1	0	1	0	6	6	0	0	0	0	71	0	0	1	0	0	0	0	2	3	3	0	1	2	0	3	3	3	2	3	3	2	3	3	4	3	3	3	3	3
1	4	2	1	2	24	1	0	0	0	0	0	0	0	3	1	0	0	0	0	72	1	0	0	0	0	0	0	0	0	0	1	0	1	1	3	3	3	3	3	3	3	3	3	3	3	3	3	3	3
1	1	3	2	2	33	1	5	0	0	1	0	0	0	0	3	0	0	0	0	96	0	0	0	0	0	0	0	0	0	0	0	0	0	3	4	4	4	4	4	4	4	4	4	4	4	4	4	4	4
1	2	1	2	2	22	1	0	0	0	1	0	0	0	2	8	0	1	0	1	73	0	0	0	0	0	0	0	2	0	3	2	0	0	3	3	3	3	2	3	3	3	3	3	3	3	3	3	4	3
1	4	3	2	2	21	1	0	1	0	0	1	0	0	13	10	2	1	1	1	59	2	2	3	0	1	3	1	1	2	3	3	1	1	0	3	2	4	3	2	3	3	3	2	3	2	2	2	4	3
1	3	3	2	2	22	1	0	1	0	0	0	0	0	6	2	0	0	0	0	95	0	1	0	0	3	0	0	1	0	0	3	0	0	0	3	4	4	4	4	4	4	4	4	4	4	4	4	4	4
1	6	2	2	4	22	1	0	0	0	0	0	0	0	8	7	1	0	1	0	69	0	1	1	0	1	0	2	1	1	2	3	0	0	3	4	3	4	1	1	4	1	1	4	4	3	3	4	2	1
2	2	2	1	2	19.5	1	1	0	0	0	0	0	0	3	9	0	1	0	1	95	0	2	0	0	2	2	1	1	0	3	0	1	0	0	4	4	4	4	4	4	4	4	4	4	4	4	4	4	4
1	6	2	1	3	26.5	1	0	1	0	0	1	0	0	7	5	0	0	0	0	68	0	2	2	0	0	0	2	2	1	1	2	0	0	0	1	2	2	2	2	4	3	3	2	2	3	3	3	4	4
1	2	2	1	3	33	1	0	0	0	1	0	0	0	9	7	1	0	1	0	73	1	0	1	0	3	0	0	1	1	3	1	0	2	3	3	3	3	2	3	4	3	3	3	3	3	3	3	4	3
1	4	3	2	2	22	1	0	0	0	0	0	0	0	4	3	0	0	0	0	91	0	0	0	1	1	0	0	1	0	1	3	0	0	0	4	4	4	4	2	4	4	2	4	4	4	4	4	4	4
1	4	3	2	2	22	1	0	0	0	0	0	0	0	4	3	0	0	0	0	91	0	0	0	1	1	0	0	1	0	1	3	0	0	0	4	4	4	4	2	4	4	2	4	4	4	4	4	4	4
1	5	2	2	4	22	1	0	0	0	0	0	0	0	8	7	1	0	1	0	69	0	1	1	0	1	0	2	1	1	2	3	0	0	3	4	3	4	1	1	4	1	1	4	4	3	3	4	2	1
2	4	2	2	3	24	1	0	0	0	0	0	1	0	6	4	0	0	0	0	71	0	1	1	0	3	0	0	3	0	0	0	0	2	0	3	2	3	3	3	3	3	3	4	3	3	3	3	3	3
1	2	3	1	3	24	1	0	0	0	1	0	0	0	5	2	0	0	0	0	71	0	0	0	0	1	0	2	1	0	0	2	0	0	1	3	3	3	1	3	3	3	3	3	3	3	4	4	3	3
1	2	3	1	3	24	1	0	0	0	1	0	0	0	5	2	0	0	0	0	72	0	0	0	0	1	0	2	1	0	0	2	0	0	1	3	3	3	1	3	4	3	3	3	3	3	4	4	3	3
2	3	2	1	3	24.9	1	1	0	1	0	0	0	0	0	4	0	0	0	0	83	0	0	0	0	0	0	0	3	0	0	0	0	0	1	4	3	4	1	4	4	2	4	4	4	4	4	4	4	1
1	3	2	3	2	19	1		0	0	0	0	1	0	12	8	2	1	1	1	87	1	1	2	1	1	1	2	1	2	2	2	0	2	2	4	4	4	3	3	4	3	4	4	4	3	3	4	4	4
2	4	2	1	3	20	1	0	0	0	0	0	0	0	5	2	0	0	0	0	73	1	0	0	0	1	0	0	2	0	0	2	0	1	0	3	3	3	4	3	3	3	3	3	3	3	2	3	3	3
1	4	1	3	4	23	1		0	0	0	0	0	0	9	11	1	2	1	1	84	1	1	2	1	3	2	0	2	0	3	1	0	2	2	4	4	4	3	3	4	3	3	3	4	3	4	3	4	4
1	5	2	2	2	23.6	1		0	0	0	0	0	0	13	9	2	1	1	1	92	1	3	1	2	3	0	0	0	2	1	3	2	3	1	4	4	4	4	4	4	4	1	4	4	4	4	4	4	4
1	3	2	2	2	25	1		0	0	0	0	0	0	2	2	0	0	0	0	83	0	0	0	0	0	0	0	0	0	2	2	0	0	0	4	4	4	4	4	4	4	4	4	1	1	4	2	4	4
1	1	3	2	2	21	1	0	0	0	0	0	0	0	3	4	0	0	0	0	73	0	0	0	0	0	0	0	1	0	0	3	0	0	3	3	3	3	1	4	4	2	4	3	3	3	3	4	3	2
1	1	3	2	2	21	1	0	0	0	0	0	0	0	3	4	0	0	0	0	73	0	0	0	0	0	0	0	1	0	0	3	0	0	3	3	3	3	1	4	4	2	4	3	3	3	3	4	3	2
1	4	1	2	2	24	1	1	0	0	1	0	0	0	6	4	0	0	0	0	84	0	1	0	1	1	1	2	1	1	0	1	0	1	0	4	3	3	4	3	3	4	4	4	2	2	3	4	3	3
1	4	2	2	4	26	1	0	0	0	1	0	0	1	4	3	0	0	0	0	96	0	0	1	0	0	0	0	0	0	3	3	0	0	0	4	4	4	4	4	4	4	4	4	4	4	4	4	4	4
2	6	2	3	3	36			0	0	0	0	0	0	6	4	0	0	0	0	86	1	0	2	1	1	0	0	2	0	1	2	0	0	0	4	3	4	4	3	4	2	3	4	4	4	4	3	3	4
1	1	3	2	2	18	0	0	0	0	0	0	0	0	10	10	1	1	1	1	65	2	2	1	1	1	3	1	2	2	2	2	0	1	0	3	3	2	3	3	2	2	2	3	3	3	2	2	4	3
1	2	1	2	2	21	0	0	0	0	0	0	0	0	8	13	1	2	1	1	67	1	2	2	0	1	3	2	1	1	3	1	2	0	2	2	3	4	3	3	3	3	1	3	3	2	3	2	2	4
1	3	1	2	2	23	0	1	0	0	0	1	1	0	11	9	2	1	1	1	67	1	0	2	0	2	3	2	1	1	1	1	2	2	2	3	4	3	3	3	3	3	2	3	4	2	3	2	2	4
1	6	2	3	3	24			0	0	0	0	0	0	10	6	1	0	1	0	85	1	0	2	0	1	0	1	3	2	3	1	0	2	0	4	4	3	3	4	4	4	3	4	4	3	4	4	4	4
1	6	2	3	1	27			0	0	0	0	0	0	14	14	2	2	1	1	84	1	2	3	3	2	3	0	0	2	0	3	3	3	3	4	4	4	4	4	4	4	1	1	4	1	4	4	4	4
2	7	2	3	4	27	0	0	0	0	0	0	1	0	7	2	0	0	0	0	74	1	0	0	0	1	0	2	1	1	0	2	0	0	1	3	3	3	3	3	3	3	3	3	4	4	3	3	3	3
1	5	3	2	3	26	0	0	0	0	0	0	0	0	6	3	0	0	0	0	81	0	3	2	0	0	0	0	0	1	0	2	0	1	0	4	3	3	4	1	4	4	1	4	4	4	4	4	3	3
1	2	2	1	3	18	0	0	0	0	1	0	0	0	4	0	0	0	0	0	71	0	0	0	0	0	0	0	0	1	0	2	0	1	0	3	2	3	2	2	3	3	2	3	4	4	3	3	3	3
1	4	1	2	3	18	0	0	0	0	0	0	0	0	4	3	0	0	0	0	75	0	0	0	0	0	0	0	3	1	0	2	0	1	0	3	3	3	3	3	4	3	3	3	4	4	3	3	3	3
1	4	2	1	4	19	0	0	0	0	0	0	0	0	8	4	1	0	1	0	76	1	1	2	0	1	0	0	1	1	0	2	2	1	0	4	2	3	3	3	4	3	3	3	4	4	3	3	3	3
1	1	1	2	2	19	0	0	0	0	0	0	0	0	16	12	2	2	1	1	62	2	1	3	1	2	3	3	2	3	3	2	0	1	2	3	4	1	3	2	3	2	3	2	3	3	1	1	4	3
7	4	2	1	3	20	0	0	0	0	0	0	0	0	7	6	0	0	0	0	71	1	1	1	0	3	0	0	2	0	0	1	0	1	3	3	2	3	3	2	3	3	2	3	4	4	3	3	3	3
1	4	2	2	3	20	0	0	0	0	0	0	0	0	1	6	0	0	0	0	75	0	1	1	0	0	0	0	3	0	0	0	2	0	0	4	3	3	3	2	4	3	3	4	3	3	3	3	3	3
1	2	1	1	2	20	0	0	0	0	0	1	1	0	12	11	2	2	1	1	62	2	1	2	1	3	3	1	2	1	3	1	1	2	0	2	3	4	2	3	2	3	2	4	3	3	2	1	2	2
1	4	2	2	3	21	0	0	0	0	0	0	0	0	6	3	0	0	0	0	72	3	0	1	0	0	0	0	1	0	1	1	0	1	1	3	3	3	3	3	2	3	3	2	4	3	3	3	3	3
1	2	1	1	3	21	0	0	0	0	0	0	1	0	13	11	2	2	1	1	67	2	1	2	1	2	2	2	2	2	1	1	2	2	2	3	3	4	3	3	3	3	2	3	4	3	3	2	2	4
1	4	2	1	3	22			0	0	0	0	0	0	15	8	2	1	1	1	89	0	2	3	3	2	0	3	0	3	3	2	0	2	0	4	4	4	4	4	4	4	4	4	4	3	3	3	4	4
5	1	1	2	3	22	0	0	0	0	0	0	0	0	5	3	0	0	0	0	78	0	0	0	0	0	0	0	0	2	0	2	0	1	3	3	2	4	3	3	4	3	3	2	3	3	3	3	4	3
1	4	2	2	3	22	0	0	0	0	1	0	0	1	1	1	0	0	0	0	86	0	0	0	0	0	0	0	0	0	0	1	0	0	1	4	4	4	4	3	4	3	4	4	4	4	4	4	4	4
1	4	2	1	3	22	0	0	0	0	0	0	1	0	9	3	1	0	1	0	72	2	1	1	0	1	0	1	1	1	0	2	0	1	1	3	3	3	3	3	3	3	3	3	3	3	3	3	3	3
1	3	1	2	2	22	0	0	0	0	1	0	0	0	12	13	2	2	1	1	64	1	0	2	1	2	3	2	2	1	3	2	2	2	2	3	3	4	2	3	3	2	1	2	2	3	2	2	4	4
1	2	3	1	2	22	0	0	0	0	0	0	0	0	17	12	2	2	1	1	64	2	2	3	1	2	3	2	1	2	2	3	1	3	2	4	3	4	2	3	3	1	3	2	3	2	2	1	4	3
2	3	1	2	2	22	0	0	0	0	0	0	0	0	12	9	2	1	1	1	60	2	2	2	1	2	3	1	2	2	0	2	0	1	1	3	3	4	2	2	3	2	2	3	2	3	3	2	3	3
2	3	1	2	2	22	0	0	1	0	1	0	0	0	13	9	2	1	1	1	62	2	0	2	2	3	2	1	1	2	2	1	0	2	2	3	3	4	3	2	3	2	3	2	3	3	2	3	2	2
1	1	1	2	3	23	0	0	0	0	0	0	0	0	10	14	1	2	1	1	63	1	1	2	2	2	3	0	3	3	2	1	1	1	2	3	2	4	3	2	4	3	3	4	3	2	2	2	2	2
1	1	1	1	2	23	0	0	1	0	0	0	0	0	11	11	2	2	1	1	63	2	1	2	0	1	3	1	1	2	2	1	2	2	2	3	2	4	3	3	3	3	2	3	3	2	1	2	2	2
1	4	1	1	3	23	0	0	0	0	0	0	0	0	11	10	2	1	1	1	60	3	1	2	1	2	0	0	2	1	3	1	1	2	2	2	2	2	2	3	2	3	3	2	3	3	3	2	2	2
2	3	1	2	2	23	0	0	0	0	0	0	0	0	15	14	2	2	1	1	64	2	2	2	2	2	2	2	3	3	2	1	1	3	2	3	3	4	2	2	3	4	3	2	3	1	3	4	1	2
1	3	1	2	2	23	0	0	0	0	0	0	0	0	12	10	2	1	1	1	61	1	1	3	1	3	3	1	1	1	1	1	1	2	2	3	3	4	2	2	3	3	3	2	2	1	4	3	3	3
2	5	3	2	3	24	0	0	0	0	0	0	0	0	7	2	0	0	0	0	73	1	0	1	0	1	0	0	1	1	0	2	0	1	1	4	3	3	3	3	4	3	3	3	3	3	3	3	3	3
1	5	2	2	3	24	0	0	0	0	0	0	0	0	0	1	0	0	0	0	90	0	0	0	0	0	0	0	1	0	0	0	0	0	0	4	4	4	4	3	4	3	3	4	4	4	4	3	4	3
1	4	2	3	3	25			0	0	0	0	0	0	2	6	0	0	0	0	90	0	0	0	0	1	2	1	1	0	3	0	0	0	0	4	4	4	4	4	4	3	4	4	4	3	3	4	4	4
2	6	1	2	3	25			0	0	0	0	0	0	10	6	1	0	1	0	85	1	0	2	0	1	1	0	1	2	1	2	0	2	3	4	4	4	4	4	4	4	4	4	4	4	1	4	4	4
1	2	1	1	2	25	0	0	1	0	0	0	0	0	14	13	2	2	1	1	63	2	1	3	1	3	3	2	2	2	2	2	2	0	2	3	3	4	2	3	3	2	2	3	2	3	3	1	3	2
1	6	2	2	3	28	0	0	1	0	1	0	0	0	5	16	0	2	0	1	71	0	3	3	1	1	3	0	3	1	2	0	3	0	1	4	4	4	4	1	1	3	1	2	4	3	4	1	3	4
1	2	3	2	3	28	0	0	1	0	1	0	0	0	4	12	0	2	0	1	85	1	2	0	1	1	2	0	1	0	2	2	1	0	3	3	4	4	3	4	4	3	4	4	4	3	3	4	4	4
1	2	2	2	2	30		1	0	0	1	0	0	0	4	10	0	1	0	1	86	1	1	0	0	0	1	1	1	0	3	0	1	2	3	4	4	4	4	4	4	4	4	4	4	1	1	1	4	4
1	4	3	2	3	17	0	0	0	0	0	0	0	0	10	4	1	0	1	0	72	0	0	3	0	2	0	0	3	1	1	2	0	2	0	3	3	3	3	3	4	3	3	3	3	3	3	3	3	3
1	3	2	1	3	18	0	0	1	0	0	0	1	0	5	6	0	0	0	0	69	0	1	2	1	1	0	0	0	0	3	2	0	0	1	3	2	3	3	2	4	3	2	3	3	3	2	3	3	3
2	5	1	1	3	20	0	0	0	0	0	0	0	0	5	0	0	0	0	0	74	0	0	0	0	0	0	0	0	3	0	1	0	1	0	3	3	3	3	3	4	3	3	3	3	4	3	3	3	3
1	1	3	1	3	21	0	0	0	0	0	0	0	0	2	4	0	0	0	0	60	0	0	1	0	0	0	0	0	1	3	0	0	0	1	1	3	1	1	4	4	2	4	4	2	3	2	4	2	1
1	5	2	2	3	22	0	0	0	0	0	0	0	0	7	1	0	0	0	0	66.7826086956522	0	0	1	0	0	0	3	1	0	0	2	0	1	0	3	2	3		3	2	1	3	2	3	4	3	3	2	2
1	3	3	2	3	22	0	0	0	0	0	0	0	0	1	4	0	0	0	0	96	0	1	0	0	0	0	1	0	0	0	0	0	0	3	4	4	4	4	4	4	4	4	4	4	4	4	4	4	4
1	1	3	2	3	22	0	0	0	0	0	0	0	0	8	4	1	0	1	0	93	1	0	2	0	1	0	0	3	1	0	3	1	0	0	4	4	4	4	4	4	4	4	4	4	4	4	3	4	4
1	1	3	2	3	22	0	0	0	0	0	0	0	0	8	3	1	0	1	0	93	1	0	2	0	1	0	0	3	1	0	3	0	0	0	4	4	4	4	4	4	4	4	4	4	4	4	3	4	4
1	6	2	2	3	23	0	0	0	0	0	0	0	0	5	2	0	0	0	0	70	0	0	1	0	0	0	1	1	2	1	1	0	0	0	3	2	3	3	3	3	3	3	3	2	3	3	3	3	3
1	5	2	1	1	23	0	0	1	0	0	0	0	0	6	0	0	0	0	0	71	0	0	2	0	1	0	0	0	0	0	2	0	1	0	3	3	3	3	3	3	3	3	3	3	3	3	3	3	3
4	4	3	2	3	23	0	0	0	0	0	0	0	0	2	2	0	0	0	0	94	0	2	0	0	0	0	0	0	0	0	2	0	0	0	4	4	4	4	3	4	4	3	4	4	4	4	4	4	4
1	2	1	2	2	23	0	0	0	0	0	0	0	0	12	12	2	2	1	1	60	2	0	3	2	1	3	2	2	1	2	0	1	3	2	3	3	3	3	4	3	4	2	2	3	1	2	2	2	1
1	4	3	2	3	24	0	0	0	0	0	0	0	0	0	4	0	0	0	0	96	0	0	0	0	0	0	0	0	0	3	0	0	0	1	4	4	4	4	4	4	4	4	4	4	4	4	4	4	4
1	5	2	2	3	24	0	0	0	0	1	0	0	1	6	3	0	0	0	0	89	1	0	0	0	3	0	0	2	0	0	2	1	0	0	4	4	4	4	4	4	3	4	2	4	4	4	3	4	3
1	1	3	1	3	24	0	0	0	0	1	0	0	0	8	5	1	0	1	0	76	2	0	0	0	1	0	2	2	0	0	3	3	0	0	4	3	4	1	2	4	2	1	4	3	4	4	4	3	3
2	6	3	4	1	25			0	0	0	0	0	0	7	3	0	0	0	0	81	0	2	2	0	1	0	0	1	1	0	0	0	3	0	4	4	4	4	3	4	3	4	4	1	2	3	4	4	4
1	6	2	2	3	25	0	0	0	0	0	0	0	0	6	2	0	0	0	0	67	1	0	2	0	0	0	0	1	0	0	2	1	1	0	3	2	3	2	2	3	2	2	3	3	3	3	3	3	3
2	6	2	2	3	25	0	0	0	0	0	0	0	0	5	0	0	0	0	0	72	0	0	2	0	0	0	0	0	0	0	2	0	1	0	3	3	3	3	3	3	3	3	3	3	3	3	3	3	3
1	3	3	2	3	25	0	0	1	0	0	0	0	1	19	17	2	2	1	1	76	3	3	3	2	3	2	1	3	3	2	3	2	3	3	4	3	4	4	2	3	3	2	3	3	4	1	3	3	3
1	2	2	2	2	25	0	0	0	0	0	0	0	0	15	14	2	2	1	1	61	1	1	1	2	3	2	3	2	2	3	2	2	3	2	3	3	4	2	3	3	2	2	2	2	3	2	2	2	2
1	4	1	2	2	25	0	0	1	0	0	0	0	0	15	11	2	2	1	1	64	1	0	3	1	1	3	2	2	3	3	3	2	2	0	3	3	4	3	3	3	2	1	3	2	4	1	2	3	2
1	1	1	2	2	25	0	0	0	0	0	0	1	0	11	13	2	2	1	1	65	2	1	2	2	2	2	2	1	2	3	1	2	0	2	2	4	3	1	3	3	2	3	3	3	3	2	2	4	4
1	5	1	2	3	26	0	0	0	0	0	0	0	0	7	1	0	0	0	0	69	1	0	1	0	1	0	0	0	0	1	2	0	2	0	3	2	2	3	3	4	3	3	3	3	3	3	3	2	3
2	5	2	2	3	26	0	0	1	0	0	0	0	0	9	3	1	0	1	0	96	1	0	3	0	3	0	0	0	0	0	2	0	0	3	4	4	4	4	4	4	4	4	4	4	4	4	4	4	4
1	4	3	2	3	26	0	0	0	0	0	0	0	0	9	10	1	1	1	1	91	0	1	0	0	3	0	3	3	0	3	3	0	0	3	4	4	4	4	2	4	4	2	4	4	4	4	4	4	4
1	2	3	2	3	28	0	0	0	0	1	0	1	0	10	1	1	0	1	0	71	0	0	2	0	1	0	1	0	2	1	2	0	2	0	3	2	3	3	3	3	3	3	3	3	3	3	3	3	3
1	4	3	2	3	28	0	0	0	0	0	0	0	0	9	8	1	1	1	1	46	3	0	1	0	2	0	0	2	0	3	3	0	0	3	1	3	1	3	4	1	4	1	1	1	2	2	1	1	4
1	3	1	1	3	30	0	0	0	0	0	0	0	0	4	0	0	0	0	0	68	0	0	0	0	1	0	0	0	0	0	2	0	1	0	3	3	3	3	2	3	3	2	3	1	3	3	3	3	3
2	5	2	2	2	18	0	0	0	0	0	0	0	0	2	2	0	0	0	0	75	0	0	0	0	1	0	1	2	0	0	0	0	0	0	3	3	3	3	2	4	3	2	3	3	4	3	3	3	3
1	1	3	2	2	20			0	0	0	0	0	0	13	6	2	0	1	0	87	1	1	2	1	2	1	1	1	2	2	2	0	3	0	4	4	4	4	4	3	3	4	4	4	4	3	3	4	3
1	3	2	3	4	20			0	0	0	0	0	0	11	5	2	0	1	0	86	1	1	2	1	2	1	2	1	1	1	1	0	2	0	3	4	4	3	4	4	3	4	4	4	4	4	3	4	4
1	1	2	2	3	20			1	0	0	0	0	0	8	1	1	0	1	0	83	0	0	0	0	3	0	3	0	2	1	0	0	0	0	4	4	4	4	3	4	4	3	4	4	3	4	3	4	4
1	4	2	3	2	20			0	0	0	0	0	0	14	12	2	2	1	1	86	1	2	2	2	2	1	3	1	1	2	2	3	3	1	4	3	3	4	4	4	3	4	4	4	4	3	4	3	3
1	2	2	2	2	20			0	0	0	0	0	0	10	11	1	2	1	1	81	0	1	2	1	1	2	3	2	1	2	2	2	1	1	4	3	4	3	4	4	3	3	3	3	4	3	2	4	4
1	2	2	2	3	21	0	0	0	0	0	0	0	0	10	2	1	0	1	0	71	3	0	2	0	1	0	0	1	1	0	2	0	1	1	3	3	2	3	3	3	3	3	3	3	3	3	3	3	3
1	4	2	3	3	22			0	0	0	0	0	0	8	3	1	0	1	0	85	1	0	2	0	1	0	1	1	1	2	1	0	1	0	3	3	4	3	3	4	4	3	4	4	3	4	4	4	4
1	5	2	3	2	22			0	0	0	0	0	0	11	7	2	0	1	0	87	1	1	1	1	2	2	2	1	2	1	1	1	2	0	4	4	4	4	4	4	4	3	3	3	4	3	4	4	4
1	4	2	3	3	22			0	0	0	0	0	0	10	10	1	1	1	1	85	1	2	2	2	1	0	2	1	2	3	1	2	1	0	4	4	4	3	4	4	3	3	4	4	1	4	3	4	4
1	3	3	2	2	22	0	0	0	0	0	0	0	0	15	14	2	2	1	1	62	2	1	2	2	3	3	1	3	3	1	2	2	2	2	3	2	4	1	3	2	1	4	4	3	2	2	3	2	1
1	2	3	3	2	22	0	0	0	0	0	0	0	0	12	11	2	2	1	1	65	2	1	3	2	1	3	2	2	2	1	2	2	0	0	3	2	4	2	3	2	2	3	3	3	3	2	2	3	3
1	1	1	1	2	22	0	0	1	0	1	0	0	0	14	10	2	1	1	1	60	2	1	3	1	1	2	3	1	2	1	1	2	2	2	3	2	3	2	2	3	3	3	2	3	2	1	4	2	3
2	3	1	2	2	22	0	0	0	0	0	0	0	0	13	11	2	2	1	1	61	1	2	2	0	1	3	2	2	2	3	2	1	3	0	2	3	4	3	3	3	3	1	2	3	2	3	2	3	4
1	4	2	1	2	22	0	0	1	0	0	0	0	0	14	11	2	2	1	1	64	1	2	2	0	2	3	1	2	3	2	3	0	2	2	3	3	4	3	3	2	3	3	3	3	1	3	2	3	3
2	4	1	2	2	22	0	0	0	0	0	0	0	0	13	10	2	1	1	1	59	2	2	2	0	2	3	1	1	2	2	2	2	2	0	3	0	3	3	2	3	3	4	3	3	3	4	1	2	3
1	3	2	2	4	23			0	0	0	0	0	0	8	9	1	1	1	1	84	0	3	1	2	2	1	1	1	2	1	1	1	1	0	4	3	3	4	4	4	3	3	3	4	4	3	1	3	4
2	6	2	2	3	23	0	0	0	0	0	0	0	0	3	4	0	0	0	0	71	1	1	1	1	0	0	0	1	0	1	1	0	0	0	3	3	3	2	3	3	3	3	3	3	3	3	3	3	3
1	4	2	2	2	24			0	0	0	0	0	0	3	8	0	1	0	1	54	0	3	0	1	0	0	2	1	1	0	0	0	0	3	1	3	4	1	1	1	4	1	1	4	3	1	1	1	1
1	5	2	2	2	24			0	0	0	0	0	0	10	7	1	0	1	0	86	1	2	2	0	1	0	1	2	2	2	1	1	2	0	4	4	4	3	3	3	3	4	4	4	3	3	4	4	4
2	5	2	4	2	25			1	0	0	1	1	0	7	1	0	0	0	0	86	1	0	2	0	1	0	0	1	1	0	1	0	1	0	4	4	3	3	4	4	3	4	4	4	3	3	3	4	4
1	4	1	1	2	25	0	0	0	0	0	0	0	0	13	11	2	2	1	1	66	2	1	3	1	1	3	2	1	2	2	0	1	3	2	3	2	4	3	3	3	3	2	2	2	1	2	2	3	3
1	3	3	1	2	26	0	0	1	0	0	0	0	1	8	11	1	2	1	1	65	3	1	2	0	2	0	0	2	1	2	0	3	0	3	4	3	3	3	2	2	3	2	2	3	3	3	2	3	3
1	5	2	2	2	27		1	0	0	0	0	0	0	9	2	1	0	1	0	90	3	1	2	0	1	0	0	1	1	0	0	0	2	0	4	4	4	4	3	3	3	4	4	4	4	4	4	4	4
1	1	1	1	2	45	0	3	1	0	0	0	0	0	13	8	2	1	1	1	76	2	3	3	0	3	0	0	1	1	0	2	1	2	3	4	3	3	1	4	3	1	4	3	3	4	4	4	3	1
1	3	2	2	4	18	0	0	0	0	0	0	0	0	7	7	0	0	0	0	96	1	0	1	0	1	0	2	1	0	3	1	0	1	3	4	4	4	4	4	4	4	4	4	4	4	4	4	4	4
1	3	2	2	4	18	0	0	0	0	0	0	0	0	7	7	0	0	0	0	96	1	0	1	0	1	0	2	1	0	3	1	0	1	3	4	4	4	4	4	4	4	4	4	4	4	4	4	4	4
1	1	1	2	3	20	0	0	0	0	0	0	0	0	3	7	0	0	0	0	76	0	0	2	0	0	0	0	2	0	1	0	3	1	1	4	3	3	1	3	3	2	4	3	4	3	4	4	4	2
1	1	3	1	2	20	0	0	1	0	0	1	0	0	4	3	0	0	0	0	68	0	0	1	0	1	0	0	1	0	1	1	0	1	1	3	3	3	1	3	3	2	3	3	3	3	3	3	3	2
1	2	2	1	2	20	0	0	1	0	0	0	0	0	12	10	2	1	1	1	58	2	1	2	1	2	1	1	2	0	3	3	0	2	2	2	3	4	3	3	2	3	4	3	3	2	2	2	3	3
1	5	1	2	2	21	0	0	0	0	0	0	0	0	3	0	0	0	0	0	71	0	0	0	0	1	0	0	0	0	0	1	0	1	0	3	3	3	3	2	4	3	2	3	3	3	3	3	3	3
1	4	2	1	4	21	0	0	0	0	0	0	0	0	10	3	1	0	1	0	64	1	1	1	0	2	0	2	2	1	0	1	0	2	0	3	2	3	2	3	2	3	2	2	2	3	3	3	2	2
1	3	2	1	4	22	0	0	0	0	0	0	0	0	4	6	0	0	0	0	71	0	2	1	0	0	0	0	0	0	3	2	0	1	1	3	2	3	3	3	3	3	3	3	3	3	3	3	3	3
1	5	3	2	3	24	0	0	0	0	0	0	0	0	3	5	0	0	0	0	79	0	0	0	0	0	0	1	2	0	3	2	0	0	0	3	3	3	3	3	3	4	4	4	3	3	3	3	4	3
1	1	1	1	4	24	0	0	0	0	1	0	0	1	4	6	0	0	0	0	87	0	1	0	0	0	0	3	2	0	0	1	0	0	3	4	4	4	4	4	4	3	4	4	4	4	4	4	4	4
1	4	3	2	3	24	0	0	0	0	0	0	0	0	0	4	0	0	0	0	96	0	0	0	0	0	0	0	0	0	3	0	0	0	1	4	4	4	4	4	4	4	4	4	4	4	4	4	4	4
2	6	2	3	1	25	0	0	0	0	0	0	1	0	9	3	1	0	1	0	89	1	0	1	0	1	1	1	2	1	0	2	0	2	0	4	1	1	4	4	4	4	4	4	4	4	4	4	4	4
1	3	1	3	2	25	0	0	0	0	1	0	0	0	14	12	2	2	1	1	60	2	2	3	1	1	3	1	1	3	1	2	2	2	2	3	2	4	1	3	2	2	4	3	3	2	2	2	3	2
3	6	2	2	2	25	0	0	0	0	0	0	1	0	14	14	2	2	1	1	96	0	3	3	2	0	0	3	3	3	2	2	1	3	3	4	4	4	4	4	4	4	4	4	4	4	4	4	4	4
1	6	2	3	2	27			1	0	0	0	0	0	11	11	2	2	1	1	86	1	1	1	1	1	2	2	2	2	2	1	2	3	1	4	4	3	4	3	4	3	4	4	3	3	3	4	4	4
1	7	2	2	4	35	0	0	0	0	0	0	1	0	5	3	0	0	0	0	80	0	0	1	0	1	0	0	1	0	1	2	0	1	1	4	3	3	4	3	3	4	2	3	4	3	4	3	4	3
2	5	1	1	2	20	6	2	0	0	0	0	0	0	11	9	2	1	1	1	60	1	2	2	1	2	3	1	1	0	1	3	1	2	0	2	2	4	1	3	3	1	2	3	3	2	3	3	2	1
1	1	1	2	2	18	5	0	1	0	0	1	0	0	13	6	2	0	1	0	82	3	1	2	1	2	1	1	2	1	0	2	1	2	0	3	4	4	3	3	2	3	3	4	4	3	3	3	4	4
2	4	2	3	1	19	5	2	1	0	0	0	0	0	14	6	2	0	1	0	83	3	0	2	0	3	1	0	3	3	1	3	0	0	1	1	4	1	4	4	4	1	4	4	4	4	4	4	4	4
1	1	1	2	2	22	5	0	0	0	0	0	0	0	7	6	0	0	0	0	54	1	0	2	0	1	2	0	1	1	1	0	1	2	1	4	2	2	2	3	2	3	3	4	3	1	1	2	2	2
1	1	1	1	3	24	5	0	0	1	0	0	0	0	4	8	0	1	0	1	69	1	1	0	0	1	0	0	1	0	3	1	0	1	3	3	3	3	3	3	3	3	3	3	3	3	3	3	3	3
2	4	2	3	1	30	5	0	0	0	0	0	0	0	18	4	2	0	1	0	88	3	1	3	0	3	0	0	2	3	1	3	0	3	0	4	4	4	4	1	4	4	1	4	4	4	4	4	4	4
2	4	2	2	2	23	5	0	1	0	1	0	0	0	13	3	2	0	1	0	68	2	0	3	1	2	2	1	0	0	0	3	0	2	0	4	4	1	3	3	4	3	4	4	4	1	4	3	1	2
2	5	1	1	3	20	5	3	0	0	0	0	0	0	12	6	2	0	1	0	62	2	0	3	1	3	3	1	1	0	0	3	1	0	0	2	2	3	1	2	2	3	2	3	3	3	4	3	3	2
4	1	1	2	3	16	5	0	1	1	0	0	0	0	11	8	2	1	1	1	61	1	2	2	1	2	1	1	2	1	1	2	1	2	0	2	2	2	4	4	2	3	3	2	2	3	1	1	2	4
1	3	2	2	4	21	4	1	0	1	0	0	1	0	12	11	2	2	1	1	90	1	1	2	1	1	2	2	2	2	2	2	2	2	1	4	3	4	4	4	4	3	4	4	4	4	3	3	4	4
2	2	1	2	2	23	4	1	0	0	0	0	0	0	11	12	2	2	1	1	61	1	1	3	2	1	3	2	2	1	2	2	0	1	2	2	2	4	3	2	3	3	2	4	3	1	2	3	2	2
3	1	1	2	3	23	4	2	0	1	1	0	1	0	12	15	2	2	1	1	73	2	2	1	2	1	2	2	3	2	3	2	2	2	1	4	3	4	2	2	2	4	4	4	3	3	4	2	4	4
1	2	2	2	4	19	4	0	0	0	0	1	1	0	13	5	2	0	1	0	69	3	2	1	1	3	0	1	1	1	1	2	0	2	0	2	3	3	3	3	3	3	3	3	3	3	3	3	3	3
2	2	1	1	2	20	4	2	0	0	0	0	0	0	14	10	2	1	1	1	63	2	1	3	1	3	3	2	1	2	2	0	1	2	1	3	2	4	2	3	2	3	3	2	3	3	3	3	2	2
1	1	2	1	2	29.9	3	1	0	1	1	1	0	0	8	11	1	2	1	1	66	0	1	1	0	1	0	1	1	3	3	1	3	1	3	2	3	2	3	2	3	3	2	3	3	3	3	3	3	3
2	4	1	1	3	19	4	1	0	0	0	0	0	0	13	12	2	2	1	1	61	2	1	2	1	1	2	2	2	2	2	3	3	1	1	1	3	4	1	3	3	2	2	3	4	3	3	2	3	2
1	4	2	2	2	23	4		0	0	0	0	1	0	14	9	2	1	1	1	88	2	1	3	1	2	2	1	1	2	2	2	1	2	1	3	4	4	4	3	4	4	4	4	4	3	4	4	4	4
1	6	2	4	4	22	4		0	0	0	1	1	0	11	7	2	0	1	0	90	1	1	2	0	1	1	1	1	3	3	1	1	2	0	4	4	3	3	4	4	3	4	4	4	4	4	4	4	3
1	2	3	2	2	19	4	2	0	1	1	1	1	0	14	11	2	2	1	1	68	3	3	2	1	2	2	2	1	2	1	1	2	2	1	2	2	2	4	4	1	4	4	2	4	1	4	1	4	4
1	3	1	2	2	23	4	0	0	0	1	0	0	0	10	10	1	1	1	1	62	1	1	1	1	2	2	1	1	2	1	3	2	0	2	3	2	4	3	2	3	3	1	3	3	3	2	2	3	3
2	6	2	3	4	20	4	1	0	0	1	0	0	0	13	3	2	0	1	0	82	1	0	2	0	2	0	2	0	1	0	2	3	3	0	2	4	4	4	3	4	3	4	4	4	3	3	4	4	4
1	1	1	1	2	22	4	1	0	0	0	0	0	0	12	15	2	2	1	1	67	1	2	2	2	1	3	2	3	2	2	2	2	2	1	3	2	4	4	4	3	3	2	2	3	3	3	3	2	1
1	4	2	3	2	22	4	1	0	0	0	0	0	0	10	7	1	0	1	0	84	1	1	1	0	1	0	2	2	2	3	1	1	2	0	4	4	3	3	4	4	3	4	4	4	3	3	3	4	4
1	4	1	1	2	22	4	1	0	0	0	0	0	0	15	11	2	2	1	1	61	1	1	3	2	2	2	2	3	2	2	2	0	3	1	3	3	1	2	1	2	4	3	2	2	4	2	1	3	4
1	3	3	2	3	21	4	0	0	0	0	0	0	1	12	9	2	1	1	1	81	0	3	3	0	0	0	2	0	3	0	1	3	3	3	4	3	3	4	1	4	4	1	4	4	4	4	4	3	3
1	5	2	2	2	21	4	0	1	1	0	0	1	0	17	9	2	1	1	1	71	3	0	3	1	3	1	2	2	1	3	2	1	3	1	3	3	3	3	3	3	3	3	3	3	3	2	3	3	3
2	3	3	1	3	36	4	1	1	0	0	0	0	0	6	7	0	0	0	0	96	2	1	0	0	1	0	0	0	0	3	3	0	0	3	4	4	4	4	4	4	4	4	4	4	4	4	4	4	4
1	1	2	1	3	29.9	3	1	1	1	1	0	1	0	15	8	2	1	1	1	60	3	2	2	2	2	1	1	2	2	1	2	0	3	0	3	2	2	2	2	3	3	2	3	3	3	3	3	2	2
1	4	2	2	2	23	3	1	0	0	0	0	0	0	12	12	2	2	1	1	62	1	2	2	0	2	3	1	2	2	1	2	2	2	2	3	3	3	3	1	3	3	2	3	3	3	1	2	3	3
1	3	2	2	4	19	3	2	1	0	0	0	0	0	14	11	2	2	1	1	61	2	1	3	2	1	3	1	1	3	1	2	1	2	2	2	3	4	1	3	3	3	2	3	3	3	2	1	4	3
1	2	1	2	2	21	3	1	0	0	1	1	0	0	11	10	2	1	1	1	64	1	1	2	1	2	3	2	1	2	2	0	2	2	0	3	2	4	3	2	4	2	2	2	3	3	3	2	3	3
4	1	3	2	1	20	3	1	1	0	1	0	0	0	9	1	1	0	1	0	81	1	1	1	0	2	0	2	0	1	0	1	0	1	0	4	3	4	4	3	4	3	2	4	4	4	4	4	2	4
2	1	1	2	3	23	3	1	0	0	0	0	0	0	11	11	2	2	1	1	61	2	1	3	1	1	3	1	0	1	3	1	1	2	2	3	2	4	3	1	2	3	4	3	3	1	2	3	3	2
1	5	1	1	2	22	3	1	0	0	0	0	0	0	14	12	2	2	1	1	66	1	2	2	2	3	3	2	2	2	2	2	0	2	1	3	4	1	2	2	2	3	2	3	3	4	3	1	3	3
1	4	1	2	2	18	3	2	1	0	0	0	0	0	10	11	1	2	1	1	68	2	1	2	0	3	2	1	1	2	2	0	3	0	2	3	2	4	3	3	3	4	3	4	3	3	3	1	4	3
1	4	2	1	2	21	3	1	1	0	0	0	0	0	12	11	2	2	1	1	65	1	2	2	1	1	2	1	1	1	1	3	2	3	2	3	3	4	3	1	3	3	2	3	3	3	1	2	4	2
1	3	1	2	2	23	3	2	1	0	0	0	0	0	16	13	2	2	1	1	63	2	2	2	2	3	2	2	1	3	2	2	2	2	2	3	2	4	2	3	2	2	2	3	3	4	2	3	2	2
1	1	3	3	3	16	3	0	0	0	1	0	0	1	3	1	0	0	0	0	84	0	0	0	0	0	0	1	0	0	0	2	0	0	1	4	4	4	3	4	3	3	3	3	4	3	3	3	4	4
2	4	1	3	1	18.5	3		0	0	0	0	0	0	9	8	1	1	1	1	79	1	2	2	1	2	1	1	2	2	2	0	0	1	0	4	4	4	4	4	3	3	4	4	4	1	3	3	4	4
1	1	1	2	2	21	3	2	0	0	0	0	0	0	15	11	2	2	1	1	65	1	2	3	0	3	3	2	1	2	2	2	2	2	1	3	2	4	3	3	3	3	3	2	3	2	3	3	2	2
1	2	1	2	2	22	3	2	0	0	0	0	0	0	16	13	2	2	1	1	71	1	2	3	0	2	2	3	3	2	3	3	1	2	2	3	3	4	3	3	4	3	2	2	3	3	3	2	4	4
2	5	1	1	3	23	3	1	0	0	0	0	0	0	13	11	2	2	1	1	68	1	1	3	0	1	3	2	2	2	2	2	3	2	0	3	3	2	2	2	2	3	3	3	4	3	2	2	4	3
1	2	1	2	4	19	3	0	1	0	1	0	1	0	7	6	0	0	0	0	76	0	0	2	0	1	1	0	2	2	0	1	0	1	3	4	2	3	3	3	4	3	3	3	3	3	3	3	3	3
3	1	2	2	2	22.25	3	0	0	0	1	0	0	0	13	8	2	1	1	1	62	1	0	2	0	1	1	1	3	3	0	2	1	3	3	3	2	4	3	1	2	3	1	2	4	3	3	1	2	4
1	4	1	3	2	24	3	0	1	0	0	1	0	0	13	12	2	2	1	1	63	2	2	2	1	3	3	2	1	0	3	2	1	2	1	3	3	4	3	3	3	3	1	2	3	3	2	2	3	3
1	2	1	1	2	24	3	0	0	0	1	0	0	0	16	13	2	2	1	1	68	2	2	3	2	2	3	2	2	2	2	3	0	2	2	4	2	4	2	4	3	3	3	2	3	4	2	2	3	2
2	4	1	1	2	23	3	0	0	0	0	0	1	0	10	13	1	2	1	1	61	1	1	2	2	2	3	1	2	1	2	1	2	2	1	3	2	3	2	2	3	3	1	3	4	2	2	3	4	3
1	4	2	2	2	27	3		0	0	0	0	0	0	11	7	2	0	1	0	91	1	1	2	2	2	1	1	1	1	1	2	1	2	0	4	4	4	3	4	3	3	4	4	4	3	4	4	4	4
2	1	2	2	2	25	3	0	1	0	0	0	0	0	11	16	2	2	1	1	61	2	2	3	2	1	3	0	2	1	3	3	2	1	2	2	2	4	3	3	3	2	3	2	2	1	2	2	3	2
1	5	2	3	1	19	3		0	0	0	0	0	0	1	6	0	0	0	0	83	0	1	0	1	0	0	1	0	0	0	0	1	0	3	4	4	4	3	3	3	2	2	2	4	3	4	3	4	4
1	4	1	2	2	17	3	0	0	0	0	1	0	0	13	13	2	2	1	1	69	2	2	2	0	2	3	1	2	3	2	2	2	1	2	3	3	4	3	2	3	3	3	2	4	3	2	2	2	3
1	2	1	1	2	22	3	1	0	0	0	0	1	0	10	8	1	1	1	1	64	1	1	1	1	2	2	1	1	2	1	2	0	1	2	3	2	4	3	2	3	3	4	4	3	2	1	2	2	2
1	4	2	3	2	24	3	1	0	0	1	0	1	0	10	8	1	1	1	1	86	1	1	2	1	1	1	2	1	1	2	1	1	2	1	4	4	3	3	4	4	3	3	4	3	4	3	3	4	4
2	2	2	2	3	23	3	0	0	0	0	0	0	0	10	11	1	2	1	1	65	2	1	2	0	1	3	0	1	2	2	1	2	2	2	3	3	4	4	1	2	2	3	3	3	3	2	2	3	3
1	3	2	3	2	20	3	1	0	0	1	0	0	0	10	6	1	0	1	0	85	1	0	2	1	1	0	2	1	1	1	1	2	2	1	4	4	4	3	4	4	3	3	4	4	4	4	3	4	4
1	1	2	1	2	35	1	2	0	1	1	0	1	0	9	8	1	1	1	1	71	2	1	2	2	2	1	0	2	0	0	2	2	1	0	2	2	2	4	3	4	4	3	1	4	3	3	3	3	3
2	3	1	1	2	22	3	1	0	0	0	0	0	0	15	11	2	2	1	1	63	1	0	3	0	2	2	2	3	2	2	3	3	2	1	4	2	2	2	2	2	3	2	2	3	3	3	3	3	2
1	3	3	2	3	22	3	2	0	0	0	0	0	0	13	15	2	2	1	1	67	2	2	3	2	3	3	0	3	3	2	1	1	1	2	3	3	4	4	2	2	2	2	4	3	3	2	2	3	2
1	2	1	1	3	24	3	2	0	0	0	0	0	0	13	9	2	1	1	1	66	1	1	2	2	3	3	1	1	1	1	3	0	2	1	3	3	4	2	3	2	4	3	3	3	3	2	2	3	3
1	1	1	2	2	22	3	1	0	0	0	0	0	0	13	9	2	1	1	1	62	1	0	1	0	3	3	1	2	3	2	1	0	3	2	3	2	4	2	2	2	3	3	2	3	2	3	3	3	2
1	5	3	2	4	23	3		0	0	0	0	1	0	7	3	0	0	0	0	83	1	1	1	0	1	0	1	1	1	0	1	1	1	0	3	4	3	3	4	3	4	4	4	3	3	4	4	4	4
1	1	3	3	1	24	3	1	1	0	1	1	1	0	13	13	2	2	1	1	44	3	2	1	1	2	2	1	2	2	3	2	1	2	2	1	1	1	4	3	1	4	4	1	2	1	2	2	1	2
1	6	3	4	2	25	3	2	1	0	1	0	1	0	18	12	2	2	1	1	84	3	1	3	1	2	2	2	1	3	3	2	2	3	2	4	4	4	3	4	4	3	3	3	4	3	3	4	4	4
1	7	2	4	4	19	3		0	0	0	0	0	0	7	1	0	0	0	0	88	0	0	2	0	1	0	1	1	1	0	1	0	1	0	4	4	4	4	3	4	4	4	4	4	3	4	4	4	4
1	6	2	2	1	22	3	0	0	0	0	0	0	0	12	5	2	0	1	0	70	2	1	2	0	1	1	0	1	3	1	2	0	2	1	3	3	3	3	3	3	3	3	2	2	3	3	3	3	3
1	5	3	2	3	24	3	0	0	0	0	0	0	0	7	8	0	1	0	1	93	0	2	0	0	3	0	0	1	1	0	3	2	0	3	4	4	4	4	4	4	4	4	4	4	4	4	3	4	4
2	4	2	2	3	25	3	0	1	0	0	0	0	0	11	5	2	0	1	0	62	3	2	3	0	2	0	1	2	0	1	2	0	0	0	2	2	3	2	3	2	3	2	2	2	3	3	2	2	3
3	7	2	2	4	24	3	0	1	1	0	0	0	0	15	13	2	2	1	1	63	3	3	3	2	3	2	0	2	0	1	3	2	3	1	3	3	3	3	2	2	3	2	2	3	3	3	3	2	3
1	4	3	2	2	22	2	0	0	0	0	0	0	0	13	7	2	0	1	0	60	1	0	2	0	2	3	2	0	2	2	2	0	2	2	3	2	3	3	3	3	3	2	2	2	2	2	3	1	3
1	1	1	2	2	23	2	0	0	0	0	1	0	0	12	13	2	2	1	1	67	2	1	1	2	2	3	3	3	2	1	0	1	2	2	3	4	3	2	3	3	3	4	2	3	1	2	4	3	3
1	5	2	2	3	23	2	0	1	0	1	0	0	0	14	3	2	0	1	0	88	2	0	2	0	3	0	2	2	1	1	3	0	1	0	4	2	4	2	4	4	3	4	4	4	4	4	3	4	4
1	4	1	2	2	24	2	0	0	0	0	0	0	0	13	10	2	1	1	1	65	1	1	3	2	1	3	1	1	2	1	2	0	3	2	3	2	4	3	2	2	3	2	2	4	2	2	3	4	4
2	3	1	2	2	23	2	1	0	0	1	0	0	0	12	14	2	2	1	1	61	1	2	1	2	2	3	1	1	2	1	3	3	2	2	3	2	3	3	2	3	3	1	2	3	3	2	2	4	3
2	3	1	1	3	23	2	2	0	0	0	0	0	0	17	8	2	1	1	1	58	2	0	3	0	1	3	3	1	2	2	3	1	3	1	3	2	2	2	2	2	2	2	3	2	3	3	3	2	4
1	2	3	2	3	23	2	0	0	0	0	0	0	0	14	10	2	1	1	1	65	2	2	2	1	2	3	1	1	2	2	2	1	3	0	3	3	4	2	3	3	3	2	4	4	2	2	3	3	2
1	3	3	2	2	21	2	0	0	0	0	0	0	0	11	8	2	1	1	1	61	2	0	1	0	2	3	1	1	3	2	2	0	0	2	3	3	4	3	3	3	3	2	2	3	3	2	2	3	1
1	2	1	1	2	24	2	3	0	0	1	0	0	0	12	14	2	2	1	1	65	2	2	2	0	1	3	3	2	2	3	2	2	0	2	4	2	4	1	3	3	4	3	3	2	3	3	3	3	3
1	7	2	3	3	25	2		1	0	0	0	0	0	12	9	2	1	1	1	55	3	1	2	1	1	1	1	2	1	3	3	0	1	1	3	2	2	1	2	2	3	3	2	2	2	2	1	2	2
1	5	3	2	2	21.5	2	0	0	0	1	0	0	0	15	9	2	1	1	1	69	2	2	3	2	1	1	2	0	2	1	3	0	2	3	3	2	2	2	3	3	3	3	4	4	4	4	4	2	3
1	4	3	3	4	25	2		1	0	0	0	1	0	10	12	1	2	1	1	87	2	2	2	2	1	2	2	2	2	2	1	1	0	1	4	4	4	2	3	4	3	3	4	4	3	4	4	4	4
1	6	2	4	4	27	2		1	0	0	0	0	0	6	1	0	0	0	0	83	1	0	0	0	1	0	1	1	1	0	1	0	1	0	4	4	3	3	3	4	4	3	4	3	3	4	3	4	3
1	1	1	2	2	20	2	0	1	0	1	0	0	0	13	11	2	2	1	1	65	2	2	2	1	3	3	2	1	3	1	1	1	0	2	2	2	4	2	4	3	3	2	2	3	2	2	4	4	2
1	1	1	2	3	23	2	0	0	0	0	0	0	0	15	8	2	1	1	1	62	2	0	3	1	3	2	1	1	2	2	1	0	3	2	3	2	4	1	2	2	3	3	2	3	2	3	3	3	2
1	5	2	2	3	23	2	0	1	0	1	0	0	1	14	3	2	0	1	0	88	2	0	2	0	3	0	2	2	1	1	3	0	1	0	4	2	4	2	4	4	3	4	4	4	4	4	3	4	4
1	4	2	3	4	25	2		1	0	0	0	0	0	5	1	0	0	0	0	79	1	0	1	0	0	0	0	1	1	0	1	0	1	0	4	4	4	3	4	3	3	4	3	3	3	1	4	4	3
1	3	1	3	4	27	2		0	0	0	0	0	0	3	1	0	0	0	0	86	0	0	0	0	0	0	0	1	1	0	1	0	1	0	3	4	4	4	4	4	4	4	3	3	4	4	1	4	4
1	2	1	2	3	28	2	0	0	0	0	0	1	0	10	1	1	0	1	0	71	0	0	2	0	1	0	2	1	2	0	2	0	1	0	3	3	3	2	3	3	3	3	3	3	3	3	3	3	3
1	4	3	2	4	30	2	1	0	1	0	0	0	0	8	4	1	0	1	0	87	1	2	1	0	1	0	1	1	1	0	1	1	2	0	4	4	4	3	3	3	4	3	4	3	4	4	4	4	3
1	1	2	2	3	19	2	0	1	0	1	0	0	0	8	1	1	0	1	0	74	0	0	2	0	0	0	3	1	0	0	2	0	1	0	3	3	3	3	2	4	3	2	4	4	3	3	3	3	3
2	4	1	2	3	20	2	0	0	0	0	0	0	0	10	6	1	0	1	0	57	1	2	2	0	1	1	1	2	1	1	2	0	2	0	3	2	4	2	2	2	3	1	3	3	2	1	2	3	4
1	3	3	1	2	22	2	0	0	0	0	0	0	0	10	11	1	2	1	1	60	1	2	2	0	1	3	2	1	2	1	2	2	0	2	3	3	4	3	1	2	3	2	3	3	1	1	2	2	2
1	3	1	1	3	23	2	2	0	0	0	0	0	0	16	14	2	2	1	1	65	2	2	3	1	2	3	2	2	1	2	3	2	3	2	4	4	4	2	3	2	3	3	4	2	3	2	3	2	1
1	5	3	4	2	24	2	1	0	0	1	0	0	0	7	3	0	0	0	0	83	1	0	1	1	1	0	1	1	1	1	1	0	1	0	4	2	4	3	4	4	3	3	3	3	4	4	3	4	4
1	2	1	1	2	24	2	0	1	0	0	0	0	0	12	13	2	2	1	1	62	1	1	3	2	2	3	0	3	1	2	3	0	2	2	3	2	4	2	3	2	3	3	3	2	2	2	2	2	2
1	4	2	2	2	20	2	0	0	0	0	0	0	0	14	9	2	1	1	1	59	1	0	3	0	1	3	2	0	2	1	2	3	3	2	3	2	4	3	3	3	3	3	2	2	2	2	2	2	3
2	3	1	3	2	23	2	0	1	0	0	0	0	0	14	9	2	1	1	1	58	1	2	3	1	1	3	2	1	2	1	3	0	2	1	2	2	1	1	3	3	3	2	3	3	3	2	2	3	1
1	1	2	2	4	26	2		1	0	0	0	0	0	0	5	0	0	0	0	96	0	0	0	0	0	0	0	0	0	2	0	0	0	3	4	4	4	4	4	4	4	4	4	4	4	4	4	4	4
1	4	1	2	3	22	2	1	1	0	0	0	0	0	17	11	2	2	1	1	66	1	2	2	0	3	2	2	1	3	1	3	3	3	2	2	0	4	2	2	2	3	3	3	4	2	3	3	4	3
1	3	2	2	2	19	2	0	0	0	0	0	0	0	13	12	2	2	1	1	61	2	0	3	2	1	3	1	1	3	2	1	2	2	2	3	3	3	3	3	3	3	2	2	3	3	3	2	3	2
1	2	3	2	2	20	2	1	0	0	1	0	0	0	13	7	2	0	1	0	85	1	0	2	0	1	0	3	2	2	1	2	3	2	1	3	3	3	3	4	3	3	4	4	4	4	4	3	3	3
1	5	1	1	2	20	2	0	0	0	0	0	0	0	15	12	2	2	1	1	68	2	2	3	0	3	3	1	3	3	2	2	0	1	2	3	3	4	3	3	3	3	3	2	2	3	2	2	2	3
1	5	1	1	3	21	2	0	0	0	0	0	0	0	10	10	1	1	1	1	65	2	2	3	0	1	3	1	1	2	1	1	1	0	2	3	4	4	3	2	2	3	2	2	4	1	3	2	3	3
1	5	2	3	2	20	2	0	1	0	0	0	0	0	16	4	2	0	1	0	70	1	1	3	0	3	1	3	0	1	1	3	0	2	1	2	2	2	4	1	2	4	2	1	2	3	3	2	2	4
1	5	2	3	2	20	2	0	1	0	0	0	0	0	16	4	2	0	1	0	70	1	1	3	0	3	1	3	0	1	1	3	0	2	1	2	2	2	4	1	2	4	2	1	2	3	3	2	2	4
2	3	2	2	3	21	2	0	0	0	0	0	1	0	8	6	1	0	1	0	61	3	2	0	0	1	2	1	0	0	0	2	1	1	1	3	2	3	2	2	3	2	2	3	2	2	3	3	3	2
1	4	2	3	3	25.5	2	0	1	0	1	1	0	0	14	9	2	1	1	1	52	2	2	1	1	2	1	2	2	3	3	1	0	3	0	3	2	2	3	1	2	3	1	2	2	3	1	2	3	4
1	3	2	3	2	24	2	0	0	0	0	0	0	0	6	2	0	0	0	0	60	1	0	0	1	1	0	0	1	1	0	3	0	0	0	1	3	1	1	4	4	2	4	4	2	3	2	4	2	1
2	4	1	2	2	22	2	0	0	0	0	0	0	0	15	11	2	2	1	1	62	2	2	2	0	2	3	1	3	3	2	3	1	2	0	1	3	4	3	2	2	4	2	2	3	3	3	3	3	3
1	4	1	1	2	20	2	0	1	0	0	1	0	0	13	8	2	1	1	1	62	2	2	3	0	2	3	2	2	2	1	2	0	0	0	3	3	4	3	3	3	3	2	2	3	1	2	2	2	3
1	3	2	3	2	24	2	0	0	0	1	0	0	0	6	2	0	0	0	0	60	1	0	0	1	1	0	0	1	1	0	3	0	0	0	1	3	1	1	4	4	2	4	4	2	3	2	4	2	1
2	3	1	2	3	20	2	0	0	0	0	0	1	0	11	13	2	2	1	1	58	1	1	3	2	2	3	1	1	1	2	1	3	2	1	2	2	4	2	3	3	3	2	3	4	1	2	3	2	3
1	3	2	1	1	17	1	1	1	0	0	0	1	0	7	7	0	0	0	0	68	1	1	2	0	1	1	0	1	1	3	2	0	0	1	2	2	2	2	3	3	3	3	3	3	2	3	3	3	3
2	6	2	4	2	26	2		0	0	0	1	1	0	12	7	2	0	1	0	82	1	1	2	1	1	2	2	1	2	1	2	1	2	0	4	4	3	3	4	4	3	3	4	3	3	4	3	4	4
1	6	2	4	2	22	2		0	0	0	0	0	0	4	5	0	0	0	0	91	1	0	0	1	1	0	0	1	1	2	0	1	1	0	4	4	4	4	4	4	4	3	4	3	3	4	4	4	4
1	3	1	1	2	19	2	0	0	0	1	0	0	0	5	2	0	0	0	0	68	1	0	1	0	1	0	0	1	0	1	1	0	1	0	3	2	3	2	2	3	3	2	3	3	3	3	3	3	3
1	4	3	3	3	26	2		1	0	0	1	0	0	10	7	1	0	1	0	86	1	1	2	1	2	1	2	1	1	2	1	1	1	0	4	4	4	3	3	3	3	4	4	4	4	3	4	4	4
1	2	2	2	2	20	2	0	1	0	1	0	0	0	8	1	1	0	1	0	91	0	0	0	0	1	0	3	1	1	0	3	0	0	0	4	4	4	3	4	4	3	4	4	4	4	4	4	4	3
2	5	1	2	2	22	2	0	0	0	1	0	0	0	12	12	2	2	1	1	62	2	1	2	0	1	3	1	1	2	2	2	3	2	2	3	3	3	3	3	3	3	3	2	3	3	1	2	2	2
2	4	3	1	2	23	2	3	1	0	0	0	0	0	11	11	2	2	1	1	66	2	1	1	0	2	3	2	2	1	1	1	2	2	2	3	3	4	2	3	3	3	3	2	3	3	1	2	4	4
2	4	2	2	3	19	2	0	0	0	0	0	0	0	12	6	2	0	1	0	71	3	2	2	0	0	0	0	2	3	0	2	2	2	0	3	2	3	3	3	3	3	3	3	3	3	3	3	3	3
1	5	1	1	2	22	2	0	0	0	0	0	0	0	12	14	2	2	1	1	68	1	1	2	1	1	3	2	2	2	2	2	3	2	2	3	2	3	3	3	2	3	3	2	3	3	3	2	3	3
2	5	1	2	2	23	2	0	0	0	0	0	0	0	15	12	2	2	1	1	65	2	1	1	0	3	2	2	1	1	3	3	3	3	2	2	3	4	3	2	3	3	2	3	3	3	3	2	2	1
1	3	1	1	2	18	1	0	1	0	0	0	0	0	16	10	2	1	1	1	65	2	2	3	1	3	3	2	2	3	2	0	0	3	0	3	3	4	2	3	3	3	2	3	4	3	4	2	3	2
1	4	1	2	2	22	1	1	0	0	0	0	0	0	11	9	2	1	1	1	59	2	1	3	1	2	3	1	3	0	0	0	0	3	1	3	3	4	2	3	3	3	1	2	4	3	3	2	3	3
2	2	2	1	2	22	1	0	0	0	0	0	0	0	15	10	2	1	1	1	63	2	0	2	0	3	3	1	3	2	2	2	0	3	2	2	3	4	2	3	3	3	2	3	4	2	2	2	2	2
1	4	1	2	2	20	1	0	0	0	0	0	0	0	14	10	2	1	1	1	62	1	0	3	0	2	3	1	2	2	3	2	0	3	2	3	3	4	2	2	2	2	3	3	3	3	1	2	4	2
1	7	2	3	1	23	1	1	1	0	1	0	0	0	15	13	2	2	1	1	89	2	2	3	2	2	1	2	3	2	3	2	1	2	1	4	4	4	3	4	4	3	3	4	4	3	4	3	4	4
2	2	1	1	2	20	1	1	0	0	0	0	0	0	13	11	2	2	1	1	62	2	1	1	2	3	3	2	2	2	1	2	0	1	2	4	3	3	2	3	3	1	2	3	3	2	3	2	2	2
1	3	3	2	2	21	1	0	0	0	0	0	0	0	13	7	2	0	1	0	68	1	0	2	0	2	3	2	0	2	2	2	0	2	2	3	2	3	3	3	3	4	3	2	3	2	3	2	3	2
1	2	3	2	3	22	1	0	0	0	0	0	0	0	11	10	2	1	1	1	66	2	0	2	1	1	2	0	3	3	0	2	2	1	2	3	2	4	3	2	4	3	2	4	3	2	3	2	4	4
1	2	1	2	3	22	1	0	0	0	1	0	0	0	12	13	2	2	1	1	70	2	1	2	2	1	3	0	2	2	1	2	2	3	2	4	3	4	3	3	3	3	3	4	2	3	3	3	2	3
2	3	2	2	2	22	1	1	0	0	1	0	0	0	13	7	2	0	1	0	64	2	1	2	1	1	2	2	1	3	1	1	1	2	0	2	3	4	1	3	3	3	1	2	3	3	2	2	4	2
1	2	2	1	2	22	1	0	1	0	0	0	0	0	15	11	2	2	1	1	65	1	2	2	1	2	3	3	2	2	1	2	0	3	2	3	3	4	3	3	3	2	2	2	3	3	3	3	3	3
1	5	1	2	3	22	1	0	0	0	1	0	0	0	12	8	2	1	1	1	57	2	1	3	1	1	1	1	1	2	1	1	1	2	2	3	3	3	2	1	2	3	2	2	3	2	2	2	3	4
2	1	1	1	2	25	1	0	1	0	0	0	1	0	9	13	1	2	1	1	60	1	2	1	0	3	3	1	2	2	2	0	2	1	2	3	2	3	3	2	3	3	3	3	3	2	1	2	2	2
1	4	2	2	3	27	1	2	0	0	0	0	0	0	13	13	2	2	1	1	63	2	2	3	0	2	3	1	2	3	3	1	2	1	1	3	2	4	3	3	2	3	2	2	3	3	2	2	3	3
2	3	3	2	3	18	1	0	0	0	0	0	0	0	8	13	1	2	1	1	63	1	2	1	1	1	3	1	2	2	3	2	0	0	2	2	2	4	3	2	4	3	1	2	4	2	2	3	4	4
1	4	3	1	3	18	1	0	1	0	0	0	0	0	3	1	0	0	0	0	68	0	0	0	0	0	0	0	1	1	0	2	0	0	0	3	3	3	3	3	3	3	3	2	2	3	3	3	2	3
2	1	2	2	2	21	1	0	0	0	0	0	0	0	13	13	2	2	1	1	63	2	0	2	0	1	3	1	2	3	3	2	3	2	2	2	3	4	2	3	3	3	2	4	3	3	2	2	2	2
1	2	2	1	1	19	1	0	0	0	0	0	0	0	7	8	0	1	0	1	74	1	1	2	0	2	1	0	3	0	3	2	0	0	0	3	3	3	3	3	4	3	3	3	4	4	3	3	3	3
2	3	2	2	2	19	1	0	0	0	0	1	0	0	15	14	2	2	1	1	66	2	2	2	0	3	3	3	1	2	3	0	3	3	2	3	2	3	3	2	3	3	2	3	3	3	2	4	3	4
1	3	2	2	2	21	1		0	0	0	0	0	0	5	1	0	0	0	0	84	1	0	1	0	1	0	0	1	1	0	1	0	0	0	3	4	3	4	4	4	3	4	4	4	3	4	3	4	4
2	4	1	1	2	21	1	0	1	0	0	0	0	0	9	10	1	1	1	1	66	1	1	1	1	2	3	1	1	2	1	2	3	0	0	3	3	4	3	2	3	3	4	4	3	4	2	2	4	2
1	7	2	2	2	37	0	1	1	0	1	0	1	0	8	3	1	0	1	0	77	1	1	2	1	3	0	0	1	0	0	2	0	0	0	3	3	2	3	3	4	3	3	4	4	3	3	3	4	4
1	3	1	1	2	17	1	0	0	0	0	0	0	0	15	8	2	1	1	1	69	1	1	3	1	3	3	2	2	3	0	0	0	3	1	3	3	4	1	3	2	3	3	3	4	3	3	2	4	3
1	4	1	1	2	22	1	0	0	0	0	0	0	0	14	12	2	2	1	1	62	2	1	3	2	2	3	0	1	2	2	2	2	3	1	3	2	4	3	3	3	1	3	3	3	1	2	3	3	2
2	3	1	2	3	22	1	1	0	0	1	0	0	0	11	15	2	2	1	1	65	1	2	3	0	1	3	1	3	2	2	0	3	3	2	3	3	3	3	2	3	3	2	3	3	3	1	2	4	2
1	7	2	4	3	26	1		0	0	0	0	0	0	10	7	1	0	1	0	70	1	2	2	1	1	0	2	1	1	2	1	1	2	0	3	3	3	3	3	3	2	3	2	3	3	3	3	3	3
2	2	2	2	2	19	1	0	1	0	0	0	0	0	11	10	2	1	1	1	67	1	1	1	1	2	3	2	1	2	1	1	1	2	2	3	0	4	3	3	3	3	3	3	3	3	3	2	4	2
2	1	1	1	3	20	1	0	0	0	0	0	0	0	10	11	1	2	1	1	60	1	2	3	1	1	3	2	0	1	2	2	1	0	2	3	2	4	3	2	2	3	3	3	2	2	2	4	3	2
1	2	2	1	2	20	1	0	0	0	0	0	0	0	13	13	2	2	1	1	63	2	2	1	1	2	3	1	2	2	2	2	1	3	2	3	2	4	3	4	3	3	2	2	3	3	1	4	3	2
1	3	3	2	2	20	1	0	0	0	0	0	0	0	11	10	2	1	1	1	69	1	0	2	0	2	3	0	0	2	2	2	3	2	2	3	3	3	3	3	3	4	2	3	2	2	2	3	3	3
1	2	1	1	2	21	1	0	0	0	0	0	0	0	10	9	1	1	1	1	61	2	0	1	1	1	1	2	3	3	2	0	0	1	2	4	2	2	2	3	3	1	2	3	3	2	2	3	3	3
1	2	1	2	2	21	1	0	0	0	1	0	0	0	16	12	2	2	1	1	65	2	1	3	1	3	3	3	2	2	2	1	1	2	2	3	3	3	3	3	3	2	2	4	3	3	3	3	2	4
2	3	1	1	2	22	1	0	0	0	0	0	0	0	14	9	2	1	1	1	57	1	1	3	0	2	2	2	2	2	1	2	1	2	2	2	3	3	3	2	2	3	2	2	3	3	2	3	2	2
1	3	3	2	4	22	1	1	0	0	0	0	0	0	15	13	2	2	1	1	63	1	1	2	2	3	3	2	2	3	2	2	1	2	2	3	4	4	3	3	3	3	2	3	3	2	2	2	3	2
2	2	1	1	3	22	1	1	0	0	0	0	0	0	10	14	1	2	1	1	66	1	1	3	1	1	3	1	3	1	2	0	2	3	2	3	2	4	2	2	3	3	1	4	3	2	1	2	3	4
2	2	3	1	4	23	1	0	0	0	0	0	0	0	12	11	2	2	1	1	59	2	2	2	0	3	1	2	1	2	2	0	3	1	2	2	3	4	2	3	2	3	1	3	3	2	2	1	1	2
2	4	2	1	2	23	1	1	0	0	0	0	1	0	13	12	2	2	1	1	62	2	2	3	0	2	2	2	2	2	3	0	2	2	1	3	3	4	1	3	2	3	2	3	3	3	2	2	3	2
2	2	1	2	3	22	1	0	0	0	0	0	0	0	11	7	2	0	1	0	63	2	0	2	1	1	2	2	1	2	1	2	0	0	2	2	3	4	3	2	2	3	3	3	3	2	3	2	3	1
1	4	1	2	2	20	1	0	0	0	0	1	0	0	13	11	2	2	1	1	64	2	1	2	0	3	3	1	2	2	2	1	1	2	2	3	2	4	3	3	3	3	3	3	4	3	2	2	4	2
1	4	1	1	2	20	1	0	0	0	1	1	0	0	10	9	1	1	1	1	59	2	1	3	1	1	3	1	2	1	1	0	1	2	0	3	2	4	3	2	3	3	2	2	3	2	1	2	3	3
1	1	2	1	2	21	1	0	1	0	0	0	0	0	14	6	2	0	1	0	64	3	1	0	0	3	0	3	1	1	2	2	1	2	1	3	1	2	3	2	3	3	2	3	4	3	2	3	3	3
2	3	2	2	2	23	1	0	1	0	0	0	0	0	8	9	1	1	1	1	62	1	1	1	1	2	2	1	2	1	1	2	0	0	2	3	3	3	3	2	2	3	2	3	3	2	1	2	2	3
1	5	2	2	2	33	1	0	1	0	0	0	0	0	4	2	0	0	0	0	96	0	0	0	0	1	0	0	0	0	2	3	0	0	0	4	4	4	4	4	4	4	4	4	4	4	4	4	4	4
1	6	2	2	4	26	1	0	1	0	1	0	0	0	8	6	1	0	1	0	91	1	1	2	0	3	0	0	3	1	2	0	0	1	0	4	4	4	4	4	3	4	4	2	4	4	4	3	4	4
1	5	2	2	4	26	1	0	1	0	1	0	0	0	8	6	1	0	1	0	91	1	1	2	0	3	0	0	3	1	2	0	0	1	0	4	4	4	4	4	3	4	4	2	4	4	4	3	4	4
1	3	2	1	3	27	1	0	0	0	0	0	0	0	12	4	2	0	1	0	69	1	0	2	0	2	0	1	1	2	3	2	0	2	0	3	2	3	2	2	3	2	1	4	4	4	3	3	3	3
1	1	1	2	3	25	1	0	0	0	0	0	0	0	14	9	2	1	1	1	63	2	0	3	0	3	3	1	0	2	2	1	2	2	2	3	2	4	2	1	2	3	4	3	3	1	2	3	3	2
1	3	2	2	2	23	1	1	1	1	0	0	1	0	12	9	2	1	1	1	85	1	2	2	1	1	1	2	1	2	2	2	1	2	1	4	3	4	3	4	4	3	4	4	4	4	3	3	4	3
1	3	2	2	3	23	1	0	0	0	1	0	0	0	9	1	1	0	1	0	73	1	0	2	0	1	0	0	1	1	0	2	0	2	0	3	3	3	3	3	4	3	3	3	4	3	3	3	3	3
2	3	1	1	2	22	1	0	1	0	0	0	0	0	15	11	2	2	1	1	63	2	1	2	2	2	3	3	1	2	2	3	0	1	2	3	3	2	1	3	3	2	2	3	3	2	2	3	4	4
2	3	2	2	2	24	1	0	0	0	0	0	0	0	10	13	1	2	1	1	59	1	2	2	2	2	2	2	2	1	3	1	0	1	2	3	2	3	3	2	3	3	2	2	4	1	2	3	2	2
1	1	1	1	2	18	0	0	1	0	0	0	0	0	12	8	2	1	1	1	61	1	1	2	1	1	1	3	3	2	1	2	0	1	1	3	4	1	3	3	3	3	2	2	3	3	2	2	3	3
1	4	1	1	2	22	0	0	0	0	1	0	0	0	13	12	2	2	1	1	71	1	2	2	0	3	3	2	3	2	2	2	0	1	2	3	3	4	3	3	3	3	3	3	4	3	3	2	3	3
2	4	1	1	2	25	0	0	0	0	0	0	0	0	12	12	2	2	1	1	64	2	1	2	2	2	3	0	1	1	1	2	3	3	1	3	4	4	2	2	3	2	3	4	2	2	3	3	2	2
2	4	1	1	2	25	0	0	0	0	0	1	0	0	14	9	2	1	1	1	65	2	1	3	1	2	2	0	2	2	1	2	1	3	1	3	2	4	3	4	3	1	3	4	3	2	2	2	4	3
1	3	3	1	2	21	0	0	0	0	0	0	0	0	9	11	1	2	1	1	58	1	2	2	0	2	2	1	1	2	2	1	2	0	2	3	2	3	3	1	3	3	2	4	3	3	3	2	2	4
1	2	1	2	2	21	0	0	1	0	1	0	0	0	13	11	2	2	1	1	63	2	0	2	0	2	3	1	1	2	2	2	3	2	2	3	3	3	3	3	3	2	1	4	3	3	1	2	3	2
1	3	1	2	2	22	0	0	0	0	0	0	0	0	11	15	2	2	1	1	60	1	2	2	1	3	3	1	2	0	2	2	3	2	2	2	3	4	3	2	2	2	2	2	3	3	2	3	1	2
1	3	1	1	2	19	0	0	0	0	0	0	0	0	8	11	1	2	1	1	66	1	2	1	0	1	3	1	1	0	1	2	2	2	2	3	2	4	3	2	3	3	3	3	3	3	1	2	3	3
1	1	1	1	2	20	0	0	1	0	0	0	0	0	13	10	2	1	1	1	57	1	1	3	1	3	3	1	2	2	0	1	1	2	2	2	3	2	1	3	2	3	1	3	3	3	4	1	2	2
1	2	1	1	3	21	0	0	0	0	0	0	0	0	12	13	2	2	1	1	61	2	2	3	0	1	3	1	1	3	2	1	3	1	2	3	2	4	3	3	2	4	3	4	3	3	2	1	3	3
1	2	1	2	2	21	0	0	0	0	0	0	0	0	12	11	2	2	1	1	56	2	0	2	2	1	3	2	1	2	2	1	1	2	2	2	3	1	2	2	3	3	2	3	2	2	2	2	2	2
1	1	1	2	4	21	0	0	0	0	1	0	0	0	11	9	2	1	1	1	62	2	1	3	1	2	3	0	2	2	0	2	1	0	1	4	3	4	3	3	3	3	3	1	3	2	3	3	2	3
1	4	1	1	3	22	0	0	0	0	0	0	0	0	11	10	2	1	1	1	67	1	1	3	1	1	3	2	1	0	1	2	1	2	2	3	1	4	3	2	3	3	4	3	3	3	2	2	3	3
2	2	1	2	2	22	0	0	0	0	0	0	0	0	13	13	2	2	1	1	60	1	1	2	2	2	3	3	2	2	2	0	1	3	2	3	2	4	3	3	3	4	1	2	3	2	2	2	2	3
1	2	1	2	2	22	0	1	1	0	0	0	0	0	10	11	1	2	1	1	62	2	2	3	0	1	2	1	2	2	2	1	1	0	2	3	2	3	3	3	3	3	1	3	3	3	1	2	3	2
1	2	1	2	2	22	0	1	0	0	0	0	0	0	16	10	2	1	1	1	62	2	1	3	1	3	3	2	1	2	1	2	1	2	2	1	2	3	4	3	3	3	2	3	3	2	2	1	4	1
1	1	1	1	2	22	0	0	0	0	0	0	0	0	9	11	1	2	1	1	60	1	2	1	0	2	3	1	2	1	1	1	1	2	2	3	3	2	2	2	3	3	2	2	2	2	3	3	3	3
2	2	3	1	4	22	0	0	0	0	0	0	0	0	14	10	2	1	1	1	63	2	2	3	0	3	3	2	1	2	1	1	2	1	1	3	3	4	2	3	3	3	2	3	3	3	1	1	1	4
1	1	2	2	2	23	0	0	0	0	0	0	0	0	16	12	2	2	1	1	59	2	1	3	2	2	3	2	1	3	0	1	3	3	2	1	2	4	1	4	3	3	1	2	3	2	3	3	4	1
1	6	1	2	3	24			1	0	0	0	0	0	9	9	1	1	1	1	87	3	1	0	3	2	1	1	1	1	2	1	1	1	0	4	4	4	4	4	4	4	4	4	4	3	3	3	4	4
2	1	1	2	2	24	0	0	0	0	0	0	0	0	13	11	2	2	1	1	64	3	1	2	1	1	3	2	2	3	2	0	0	2	2	3	3	4	3	2	3	3	3	3	3	3	2	2	3	3
1	2	1	3	2	24	0	0	0	0	0	0	0	0	11	9	2	1	1	1	59	1	1	1	1	1	3	1	1	2	1	2	0	3	2	3	3	3	3	2	3	3	2	3	2	3	1	2	4	2
1	2	2	1	3	25	0	0	0	0	0	0	0	0	7	12	0	2	0	1	70	0	0	2	0	0	3	2	3	0	3	2	0	1	3	3	2	2	3	3	4	3	3	3	3	3	3	3	3	3
2	2	3	1	4	25	0	0	0	0	0	0	0	0	14	10	2	1	1	1	63	2	2	3	0	2	3	2	3	3	0	1	2	1	0	2	4	4	2	3	2	3	1	3	3	3	2	2	3	3
3	2	3	2	2	26		1	0	0	0	0	0	0	10	6	1	0	1	0	88	1	1	2	0	2	1	1	1	1	1	2	1	1	1	4	4	4	3	4	4	4	4	3	3	3	4	4	4	3
1	4	3	2	2	22	0	1	0	0	0	0	0	0	8	12	1	2	1	1	59	1	2	1	1	2	3	1	2	1	2	0	0	2	2	3	2	3	3	1	3	3	1	4	3	3	2	2	2	4
1	3	1	2	2	25	0	0	0	0	0	0	0	0	14	13	2	2	1	1	60	1	2	3	1	2	3	3	2	2	2	1	1	2	2	2	4	2	1	3	3	2	2	3	2	3	2	2	2	2
1	2	1	2	2	25	0	0	0	0	0	0	0	0	10	11	1	2	1	1	63	1	2	3	1	1	3	2	1	3	2	0	2	0	0	3	4	3	1	3	2	1	4	4	3	2	2	2	3	2
1	1	1	2	2	17	0	0	0	0	0	0	0	0	12	9	2	1	1	1	67	2	1	3	1	1	3	1	1	2	2	1	0	2	1	3	2	4	4	2	3	2	3	2	3	4	4	4	2	3
1	3	2	3	2	18			0	0	0	0	0	0	11	10	2	1	1	1	85	2	2	2	1	2	1	2	1	1	3	1	1	1	1	4	4	4	3	4	4	4	3	4	3	3	3	4	4	4
1	2	1	1	3	18	0	0	0	0	0	0	0	0	10	12	1	2	1	1	68	1	2	1	0	1	3	1	2	2	2	2	3	2	0	3	3	4	3	2	3	3	3	2	3	3	1	2	4	2
2	2	3	2	3	19	0	0	0	0	0	0	0	0	12	12	2	2	1	1	61	2	0	2	0	1	3	3	2	2	3	2	2	0	2	3	3	4	3	2	3	2	1	3	3	3	3	2	2	3
1	2	1	2	2	19	0	0	0	0	0	0	0	0	10	11	1	2	1	1	66	1	0	2	1	3	3	1	2	2	0	0	3	1	2	3	4	2	3	2	3	2	3	2	4	4	1	2	3	3
1	4	3	1	2	20	0	0	0	0	0	0	0	0	14	12	2	2	1	1	58	1	0	2	1	2	3	3	2	2	1	2	3	2	2	3	2	4	3	2	3	3	1	3	3	3	3	2	2	3
2	4	2	1	2	20	0	0	0	0	0	1	0	0	11	11	2	2	1	1	57	1	2	3	0	3	3	1	1	0	3	0	0	3	2	3	3	4	3	3	3	3	2	2	3	2	2	1	2	3
1	3	2	3	2	21			0	0	0	0	0	0	8	8	1	1	1	1	84	1	2	1	1	1	0	2	1	1	1	1	2	1	1	4	4	3	3	4	4	4	4	4	4	3	4	3	4	4
2	4	1	1	2	21	0	1	0	0	0	0	0	0	15	12	2	2	1	1	57	1	1	2	1	2	3	3	2	2	2	3	1	2	2	3	2	4	3	2	3	3	3	2	3	3	2	1	2	3
2	3	1	2	2	21	0	0	0	0	0	0	0	0	15	10	2	1	1	1	57	2	1	3	1	2	2	1	2	2	2	2	0	3	2	3	0	3	2	2	3	3	2	4	3	3	2	2	3	2
2	4	2	2	4	22			0	0	0	0	0	0	10	4	1	0	1	0	85	1	0	2	0	1	1	3	0	1	3	0	0	2	0	4	4	4	4	4	4	3	3	4	4	3	3	3	4	4
1	2	1	2	4	22	0	1	0	0	1	0	0	0	14	13	2	2	1	1	64	2	2	3	2	2	3	0	2	2	1	2	2	3	1	4	2	4	3	3	2	3	3	2	3	2	4	1	3	3
2	4	1	2	2	22	0	0	0	0	0	0	0	0	11	9	2	1	1	1	56	2	1	1	0	2	3	1	1	2	3	0	1	3	0	2	0	3	3	2	3	3	2	3	3	2	1	2	2	3
1	2	1	2	2	23	0	1	0	0	0	0	0	0	11	12	2	2	1	1	66	1	1	2	1	1	3	1	1	2	2	1	2	3	2	3	2	4	3	2	3	2	3	3	3	4	4	2	4	4
1	3	2	2	4	23	0	0	0	0	0	0	0	0	15	13	2	2	1	1	62	2	2	3	1	3	3	1	2	2	2	2	2	2	1	4	3	4	3	3	2	3	3	2	3	1	4	3	2	3
2	4	1	2	2	23	0	0	0	0	0	0	0	0	15	13	2	2	1	1	63	1	2	3	0	1	3	2	1	2	3	3	3	3	1	3	4	2	2	2	3	2	2	3	3	3	2	3	3	3
2	4	3	1	2	24	0	0	0	0	0	0	0	0	11	12	2	2	1	1	60	1	2	3	1	1	2	1	1	1	1	2	3	2	2	3	2	3	3	2	3	3	1	3	3	3	2	2	3	3
1	4	2	2	2	24	0	0	1	0	0	0	0	0	13	10	2	1	1	1	62	1	0	2	1	2	3	2	1	2	1	2	2	2	2	3	2	4	3	1	3	3	2	3	3	1	1	2	3	3
2	4	2	1	3	24	0	0	0	0	0	1	0	0	11	10	2	1	1	1	58	1	1	3	0	2	3	1	2	1	1	2	1	1	2	3	2	4	3	1	3	3	3	2	3	1	1	2	4	3
2	4	1	2	2	24	0	0	0	0	0	0	0	0	13	9	2	1	1	1	62	1	1	2	0	3	3	3	2	2	0	2	1	0	2	1	3	4	3	2	2	3	2	2	3	3	3	4	1	2
1	4	2	1	2	25	0	0	1	0	0	0	0	0	11	10	2	1	1	1	66	1	1	3	0	2	2	1	3	2	1	2	1	0	2	3	3	3	3	3	3	3	1	4	3	3	2	3	3	3
2	2	1	1	2	24	0	0	1	0	0	0	0	0	12	12	2	2	1	1	62	2	2	3	2	3	3	2	1	1	1	1	2	0	1	4	3	4	3	3	3	2	3	3	3	3	2	2	3	3
2	3	1	1	3	24	0	0	1	0	0	0	0	0	14	11	2	2	1	1	68	2	0	1	2	2	2	2	2	2	2	2	1	3	2	4	3	4	2	3	3	3	3	4	2	4	1	2	4	4
[truncated: 81 more columns]
